# Supplementary material
Source: PubMed Central journal article supplement (PMC4525166)
Supplement: ncomms8857-s1.pdf [file ncomms8857-s1.pdf]

# Supplementary Information

## Supplemental Figures

### Figure S1

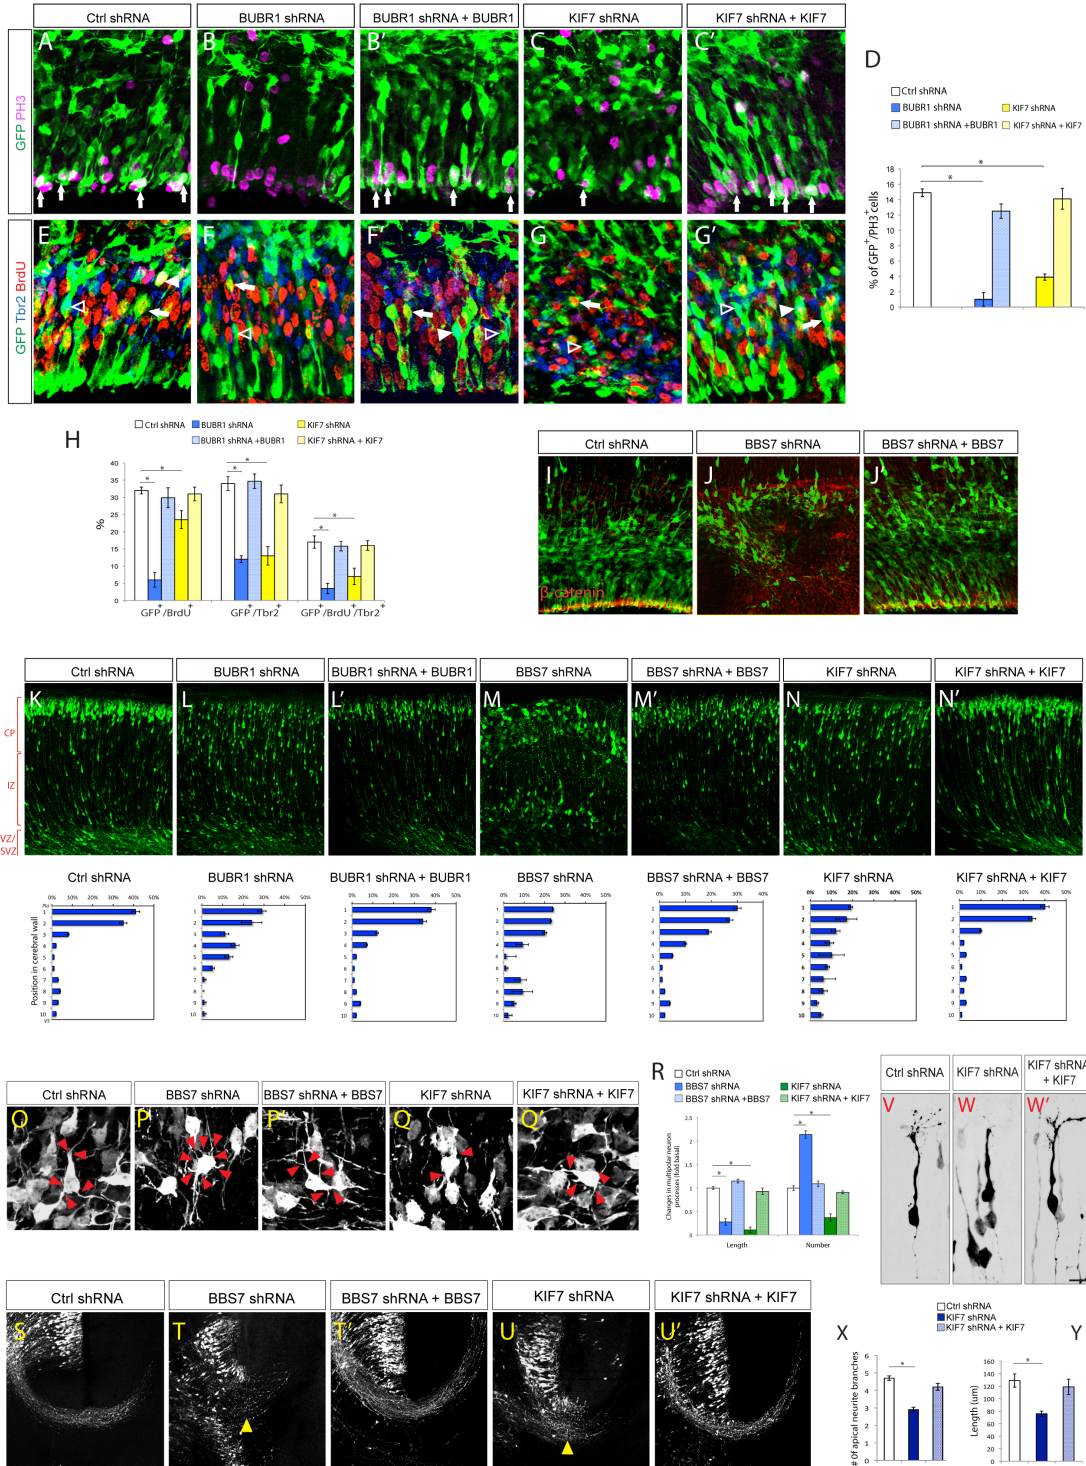

**Figure S1. Rescue of BBS7, BUBR1 [BUB1B], and KIF7 shRNA mediated effects in the developing cerebral cortex.** BBS7, BUBR1 [BUB1B], and KIF7 shRNAs disrupted distinct aspects of progenitor development, neuronal migration, and axon growth. Expression of human BBS7, BUBR1, or KIF7 (which are not targeted by murine shRNAs) rescued the respective shRNA phenotypes. (A-D) Proliferating GFP<sup>+</sup>/PH3<sup>+</sup> RG progenitors in VZ (arrow) in control cortices (A). (B-C) In contrast, knockdown of BUBR1 (B) and KIF7 (C) resulted in significantly reduced proliferation of RG progenitors (D). Expression of human BBS7 or KIF7 rescued the shRNA phenotypes (B', C', D). (E-H) Co-labeling with anti-GFP, BrdU and Tbr2 antibodies indicates that knockdown of BUBR1 (F) and KIF7 (G) resulted in reduced percentage of Tbr2<sup>+</sup> cells (Tbr2<sup>+</sup>/GFP<sup>+</sup> [open arrowhead]) and mitotic progenitors (BrdU<sup>+</sup>/GFP<sup>+</sup>[arrow], Tbr2<sup>+</sup>/BrdU<sup>+</sup>/GFP<sup>+</sup>[filled arrowhead]; H). (F', G', H) Expression of human BUBR1 or KIF7 rescued these defects. (I, J, J') BBS7 shRNA disrupted VZ organization (J), which was rescued with BBS7 (J'). (K-N) GFP<sup>+</sup> neurons express shRNAs against BUBR1 (L), BBS7 (M), and KIF7 (N) do not migrate normally. shRNAs were electroporated at E14.5 and cortices were analyzed at E18.5. (L', M', N') Rescue of migration defects with BUBR1, BBS7 and KIF7. (K''-M'') Quantification of GFP<sup>+</sup> cell position in the developing cortical wall. (O-R). Altered multipolar neuronal branching in BBS7 (P) and KIF7 (Q) shRNA expressing cortices, rescued with human BBS7 (P') and KIF7 (Q'), respectively (R). Red arrowheads (O-Q) indicate processes. (S-U) GFP<sup>+</sup> neurons expressing shRNA against BBS7 (T) and KIF7 (U), display midline crossing defects (arrowhead, T, U) in the developing cerebral wall. (T', U') Rescue of crossing defects with human KIF7 and BBS7, respectively. (V-Z) Neurons expressing KIF7 (W) shRNAs display significantly reduced total non axonal-neurite length and branching. (X') KIF7 rescue of shRNA effect. Quantification of average apical neurite number (Y) and total length (Z). Data shown are mean ± SEM. \**P*<0.05 (Student's *t*-test). Number of brains/ group= 4. Scale bar: A-G, 12.5μm; I-J, 42μm; K-N, 67μm; O-Q, 9μm; S-U, 125μm; V-W, 15μm. CP, cortical plate; IZ, intermediate zone; SVZ, subventricular zone; VZ, ventricular zone.

**Figure S2**

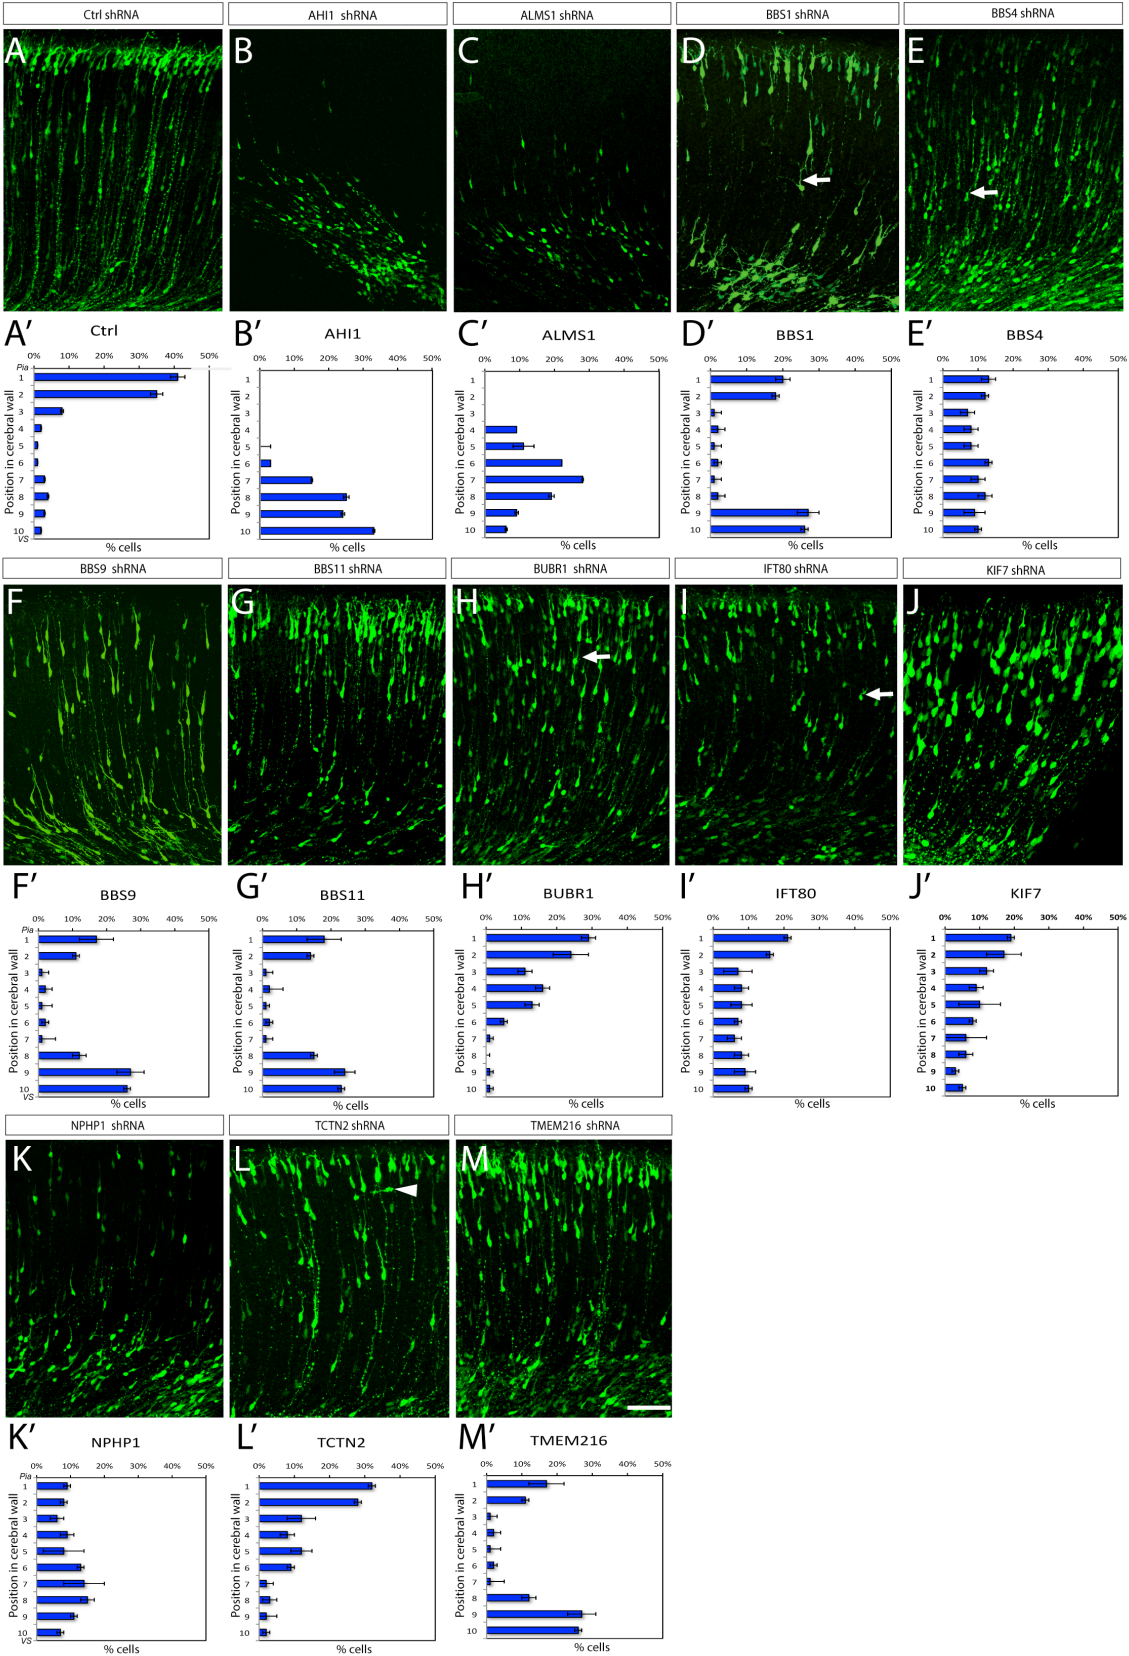

**Figure S2. Ciliopathy gene deficiency and neuronal migration.** (A-M) E14.5 embryonic cortices were electroporated and the position of GFP<sup>+</sup> neurons in the development cerebral cortex were analyzed at E18.5. Representative images are shown (also see Table 5). AHI1, ALMS1, BBS1, BBS4, BBS9 [TRIM32], BBS11, BUBR1 [BUB1B], IFT80, KIF7, NPHP1, TCTN2 and TMEM216 shRNAs significantly retarded neuronal migration in different ways as compared to control shRNA. Arrows [D, E, H, I] indicate branched leading processes. Arrowhead [L] indicates misoriented leading process. (A'-M') Quantification of GFP<sup>+</sup> cell position in the developing cortical wall (E18.5). Number of brains/ group= 4. Scale bar, A-C, E, G-I, K, M, 80μm; D, J, F, L, 68μm.

**Figure S3**

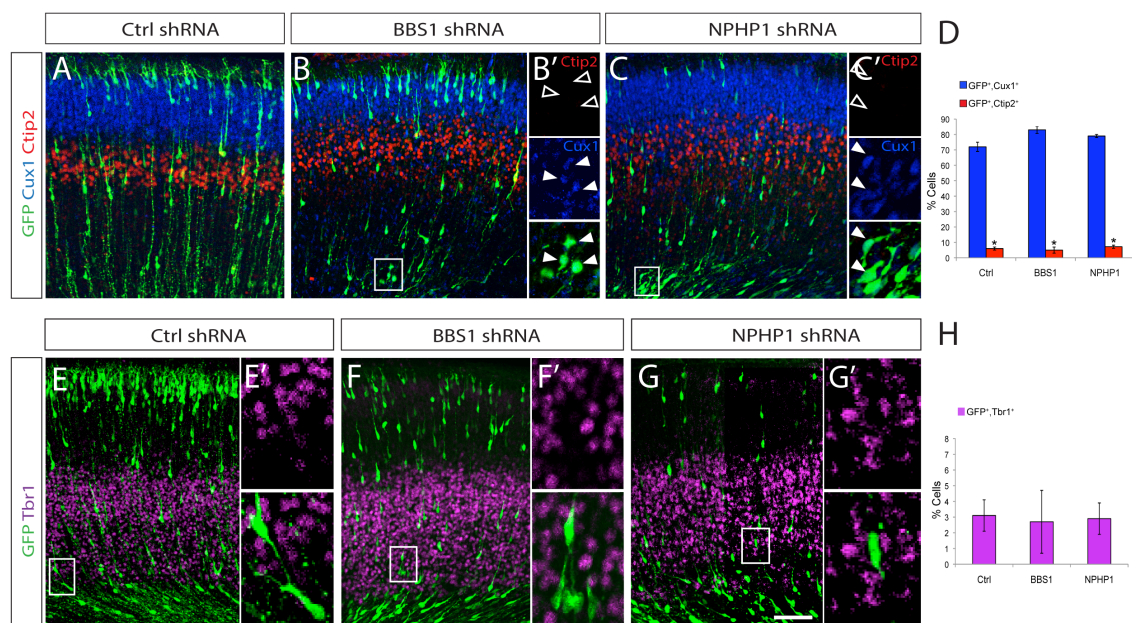

**Figure S3. Effect of ciliopathy genes on neuronal identity.** (A-G) GFP<sup>+</sup> neurons were co-labeled with antibodies to Cux1 (layer II/III; A-C), Ctip2 (layer V; A-C), and Tbr1 (layer VI; E-G). Even though aberrantly migrating BBS1 (B) or NPHP1 (C) shRNA expressing neurons expressed Cux1 and were ectopically localized away from the emerging layers, the percentage shRNA expressing (GFP<sup>+</sup>) neurons that co-labeled with Cux1 (GFP<sup>+</sup>/Cux1<sup>+</sup>), Ctip2 (GFP<sup>+</sup>/Ctip2<sup>+</sup>), or Tbr1 (GFP<sup>+</sup>/Tbr1<sup>+</sup>) was not altered compared to control (D, H). (B', C') Higher magnification images of outlined areas in (B)

and (C) show ectopically localized neurons are Cux1(arrowhead), but not Ctip2 (open arrowheads) positive. (E'-G') Higher magnification images of outlined areas in E-G show GFP<sup>+</sup> neurons are not Tbr1 positive. (D, H) Quantification of the percentage of GFP<sup>+</sup>/layer marker<sup>+</sup> neurons. No significant changes were observed, indicating shRNA expression affected migration and placement but not neuronal identity. Data shown are mean  $\pm$  SEM. \* $P \geq 0.05$  (Student's *t*-test). Number of brains/ group= 4. Scale bar: A-C, 90 $\mu$ m; E-G, 85 $\mu$ m.

Figure S4

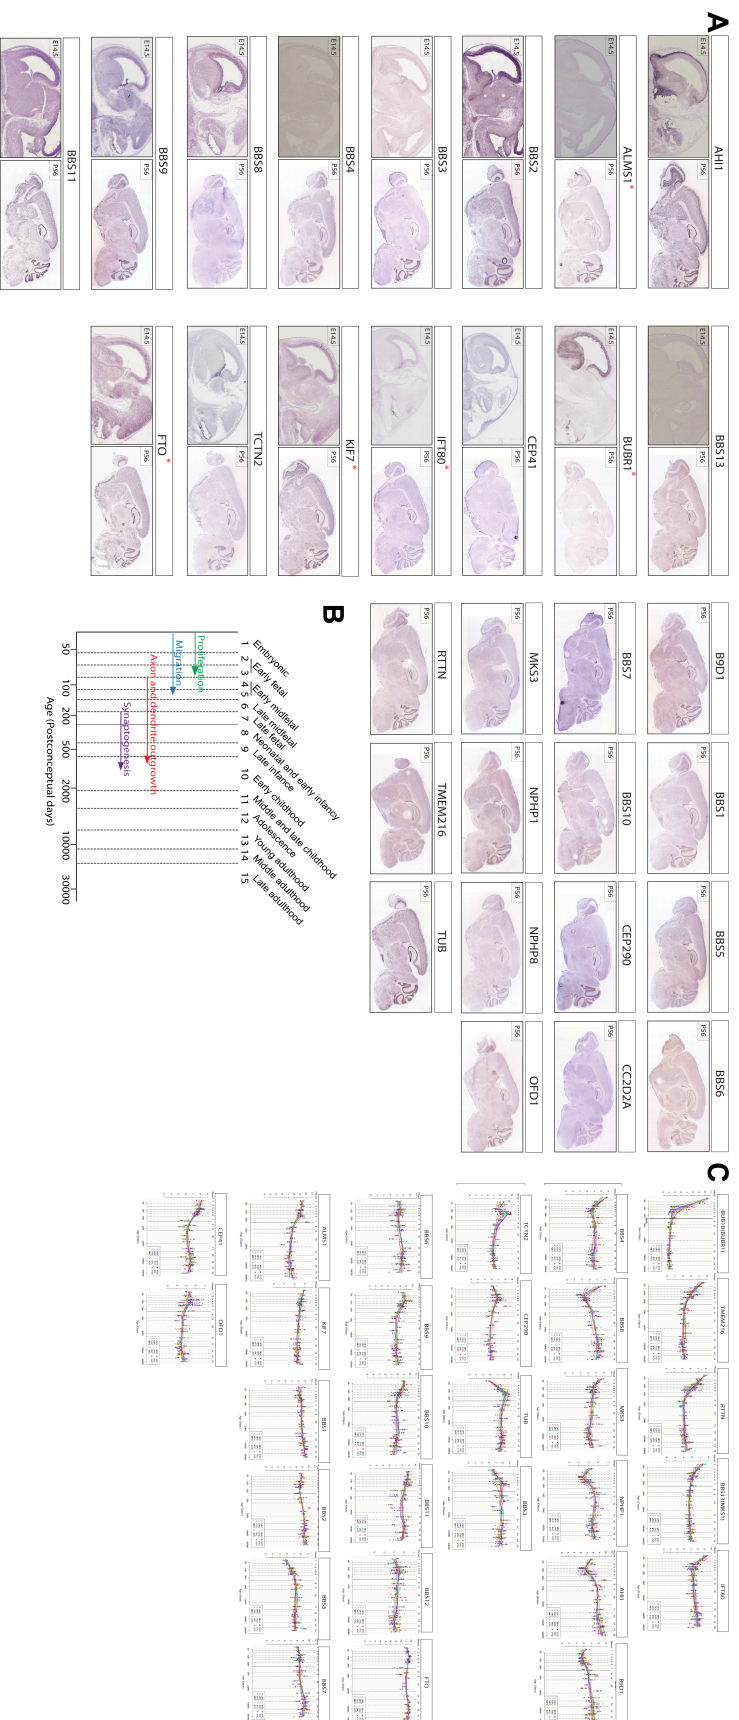

**Figure S4. Developmental expression of ciliopathy genes.** The expression patterns of the tested ciliopathy genes in mouse cerebral cortex [E14.5 (<http://www.eurexpress.org/ee/>)<sup>98</sup> and P56 (<http://www.brain-map.org/>)]<sup>99</sup> and human neocortex (<http://hbatlas.org/>)<sup>100</sup> (B-C). (A) In mouse, BUBR1, IFT80, and KIF7 show enriched expression in the proliferative zones at E14.5 (A, red asterisk), consistent with our observation that BUBR1, IFT80 and KIF7 are regulators of progenitor proliferation. In humans, the expression of BUBR1, TMEM216 and IFT80 gradually declined from early embryonic stages till perinatal stage, consistent with their role in progenitor proliferation<sup>100,101,102</sup>. Thus, both mouse and human expression data support our results indicating that BUBR1, TMEM216, IFT80, and KIF7 are regulators of cortical progenitor development. In human neocortex, the expression of TCTN2 and TUB show gradual increase from early to mid fetal stages, corresponding to the time window during which neuronal migration occurs<sup>100,101,102</sup>. This pattern TCTN2 and TUB expression is consistent with their detected role as regulators of neuronal migration. Further, human transcriptome trajectories suggest that the majority of the BBS genes, BBS1, BBS2, BBS3 [ARL6], BBS5, BBS6 [MKKS], BBS7, BBS9, BBS10, BBS11 [BUB1B], and BBS12 have widespread and relatively stable expression pattern during neocortical development, consistent with our results indicating that these BBS protein members play multiple roles during cerebral cortical formation.

## Supplemental Tables

**Table S1. shRNA library of ciliopathy genes**

| Gene           | Protein family                 | Protein complex           | Ciliary localization                                            | Ciliary function                                                      | Associated ciliopathy | Brain expression                   | Brain abnormalities in humans                                                                                                                              |                                                                                      |                |     |
|----------------|--------------------------------|---------------------------|-----------------------------------------------------------------|-----------------------------------------------------------------------|-----------------------|------------------------------------|------------------------------------------------------------------------------------------------------------------------------------------------------------|--------------------------------------------------------------------------------------|----------------|-----|
| AHI1           | ND                             | ND                        | Basal body/Centrosome <sup>1</sup>                              | Ciliogenesis, ciliary-dependent WNT signaling <sup>2</sup>            | JBTS                  | Yes                                | Cerebellar vermis hypoplasia, deepened interpeduncular fossa, elongated superior cerebellar peduncles cortical heterotopias, polymicrogyria <sup>3,4</sup> |                                                                                      |                |     |
| CEP41          | Polyglutamylase enzyme         | ND                        | Basal body/Centrosome <sup>5</sup>                              | Glutamylation in the ciliary axoneme <sup>5</sup>                     | JBTS                  | Yes                                |                                                                                                                                                            |                                                                                      |                |     |
| BBS1           | BBS                            | BBSome <sup>6,7</sup>     | Basal body/centrosome, cilium <sup>6,7</sup>                    | Ciliogenesis <sup>6,7</sup> , ciliary GPCR trafficking <sup>8,9</sup> | BBS                   | Yes                                | Frontal cortical dysplasia, microcephaly, cortical and cerebellar atrophy, cortical heterotopias, polymicrogyria <sup>10</sup>                             |                                                                                      |                |     |
| BBS2           | BBS                            |                           |                                                                 |                                                                       | BBS, MKS              | Yes                                |                                                                                                                                                            |                                                                                      |                |     |
| BBS4           | BBS                            |                           |                                                                 |                                                                       | BBS, MKS              | Yes                                |                                                                                                                                                            |                                                                                      |                |     |
| BBS5           | BBS                            |                           |                                                                 |                                                                       | BBS                   | Yes                                |                                                                                                                                                            |                                                                                      |                |     |
| BBS7           | BBS                            |                           |                                                                 |                                                                       | BBS                   | Yes                                |                                                                                                                                                            |                                                                                      |                |     |
| TTC8 (BBS8)    | BBS                            |                           |                                                                 |                                                                       | BBS                   | Yes                                |                                                                                                                                                            |                                                                                      |                |     |
| BBS9           | BBS                            |                           |                                                                 |                                                                       | BBS                   | Yes                                |                                                                                                                                                            |                                                                                      |                |     |
| ARL6 (BBS3)    | BBS, small GTPase              |                           |                                                                 |                                                                       | ND                    | Basal body/centrosome <sup>1</sup> |                                                                                                                                                            | Ciliary localization of BBSome <sup>11</sup> , ciliary GPCR trafficking <sup>8</sup> | BBS            | Yes |
| MKKS (BBS6)    | type II chaperonin superfamily |                           |                                                                 |                                                                       | type II chaperonin    | Basal body/centrosome <sup>1</sup> |                                                                                                                                                            | BBSome assembly <sup>12</sup>                                                        | BBS, MKS, MKKS | Yes |
| BBS10          |                                | BBS                       | Yes                                                             |                                                                       |                       |                                    |                                                                                                                                                            |                                                                                      |                |     |
| BBS12          |                                | BBS                       | Yes                                                             |                                                                       |                       |                                    |                                                                                                                                                            |                                                                                      |                |     |
| TRIM32 (BBS11) | E3 Ubiquitin ligase            | ND                        | Basal body/centrosome <sup>1</sup> , cytoplasm <sup>3</sup>     | ND                                                                    | BBS                   | Yes                                |                                                                                                                                                            |                                                                                      |                |     |
| MKS1 (BBS13)   | Tripartite motif protein       | NPHP-JBTS-MKS, Transition | Transition zone <sup>14-16</sup> , basal body, Cilium (TMEM216, | Ciliogenesis centrosome and ciliary membrane                          | BBS, MKS              | Yes                                | Cerebellar vermis hypoplasia, deepened interpeduncular fossa,                                                                                              |                                                                                      |                |     |



|                  |                                 |                               |                                                    |                                                                          |                               |     |                                                                                                                                                                                                    |
|------------------|---------------------------------|-------------------------------|----------------------------------------------------|--------------------------------------------------------------------------|-------------------------------|-----|----------------------------------------------------------------------------------------------------------------------------------------------------------------------------------------------------|
| TMEM67 (MKS3)    | Tetraspan transmembrane protein | zone complex <sup>14-16</sup> | CEP290)                                            | composition <sup>14-18</sup> , ciliary signal transduction <sup>18</sup> | BBS, MKS, JBTS                | Yes | elongated superior cerebellar peduncles, cortical heterotopias, polymicrogyria <sup>3,4,17,19-22</sup>                                                                                             |
| TMEM216          | Tetraspan transmembrane protein |                               |                                                    |                                                                          | JBTS, MKS                     | Yes |                                                                                                                                                                                                    |
| CEP290 (BBS14)   | BBS                             |                               |                                                    |                                                                          | BBS, MKS, JBTS, NPH, LCA, SLS | Yes |                                                                                                                                                                                                    |
| CC2D2A (MKS6)    | BBS                             |                               |                                                    |                                                                          | MKS, JBTS                     | Yes |                                                                                                                                                                                                    |
| TCTN2            | Tectonic family                 |                               |                                                    |                                                                          | MKS, JBTS                     | Yes |                                                                                                                                                                                                    |
| NPHP1            | Nephrocystin family             |                               |                                                    |                                                                          | JBTS, NPH, SLS                | Yes |                                                                                                                                                                                                    |
| RPGRIP1L (NPHP8) | RPGRIP1 family                  |                               |                                                    |                                                                          | MKS, JBTS                     | Yes |                                                                                                                                                                                                    |
| B9D1             | B9D family                      |                               |                                                    |                                                                          | MKS                           | Yes |                                                                                                                                                                                                    |
| ALMS1            | ND                              | ND                            | Basal body/Centrosome <sup>2</sup> <sub>3,24</sub> | Ciliogenesis, cilium-dependent PCP signaling <sup>23,24</sup>            | ALST                          | Yes | Enlarged ventricle, gray and white matter atrophy, brain lesions <sup>25</sup>                                                                                                                     |
| BUB1B (BUBR1)    | BUB family                      | ND                            | Basal body/Centrosome <sup>2</sup> <sub>6</sub>    | Ciliogenesis <sup>26</sup>                                               | PCS <sup>27</sup>             | Yes | Microcephaly, brain hypoplasia, corpus callosal agenesis, enlarged fourth ventricle and posterior fossa, cerebellar vermis hypoplasia, hydrocephalus <sup>28</sup>                                 |
| IFT80            | IFT                             | IFT-B                         | Cilium                                             | Shh signal transduction <sup>29</sup>                                    | ATD <sup>29</sup>             | Yes | Cerebellar vermis hypoplasia, deepened interpeduncular fossa, elongated superior cerebellar peduncles <sup>3,30</sup>                                                                              |
| KIF7             | Kinesin family                  | IFT-A                         | Basal body, cilium                                 | Shh signal transduction <sup>31,32</sup>                                 | HLS2, ACLS JBST               | Yes | Hydrocephalus, corpus callosal agenesis <sup>31</sup>                                                                                                                                              |
| OFD1             | ND                              | ND                            | Basal body/Centrosome <sup>3</sup> <sub>3</sub>    | Ciliogenesis <sup>33</sup>                                               | OFD                           | Yes | Intracerebral cysts, corpus callosal agenesis, cerebellar agenesis, porencephaly, pachygyria and heterotopias, hydrocephalus, cerebral or cerebellar atrophy, and berry aneurysms <sup>34,35</sup> |
| TUB              | Tubby family                    | ND                            | Basal body/Centrosome                              | Ciliary GPCR trafficking <sup>8,9,36,37</sup>                            | Obesity                       | Yes | Brain atrophy <sup>38</sup>                                                                                                                                                                        |

|     |                                                    |    |    |                                                                     |         |     |  |
|-----|----------------------------------------------------|----|----|---------------------------------------------------------------------|---------|-----|--|
| FTO | 2-oxoglutarate-dependent nucleic acid demethylases | ND | ND | Cilia maintenance and ciliary dependent WNT signaling <sup>39</sup> | Obesity | Yes |  |
|-----|----------------------------------------------------|----|----|---------------------------------------------------------------------|---------|-----|--|

AHI1, Abelson helper integration site 1; ALMS1, Alstrom syndrome 1; ARL6, ADP-ribosylation factor-like 6; B9D1, B9 protein domain 1; BBS, Bardet-Biedl syndrome; BUB1B, BUB1 mitotic checkpoint serine/threonine kinase B; BUBR1, Bub1-related protein; CC2D2A, coiled-coil and C2 domain containing 2A; CEP 41, Centrosomal protein 41; FTO, fat mass and obesity associated; IFT80, intraflagellar transport 80 homolog (Chlamydomonas); KIF7, Kinesin family member 7; MKKS, McKusick-Kaufman syndrome; MKS, Meckle Syndrome; NPHP, Nephronophthisis; OFD1, Oral-facial-digital syndrome 1; RPGRIP, retinitis pigmentosa GTPase regulator interacting protein; TMEM, transmembrane protein; TRIM32, tripartite motif containing 32; TTC8, tetratricopeptide repeat domain 8; TUB, tubby bipartite transcription factor; ACLS, Acrocaldosal syndrome; ALST, Alstrom syndrome; ARPKD, autosomal recessive polycystic kidney disease; JATD, Jeune asphyxiating thoracic dystrophy; HLS2, Hydrolethalus syndrome 2; JBTS, Joubert syndrome; LCA, Leber congenital amaurosis; MKS, Meckel-gruber syndrome; MKKS, McKusick-Kauffman syndrome; NPH, nephronophthisis; PCS, Premature chromatid separation; SLS, Senior-Loken Syndrome; ND, not defined.

**Table S2. Other ciliopathy genes**

| Gene    | Protein family                    | Protein complex         | Ciliary localization       | Ciliary function                                                                                                         | Associated ciliopathy        | Brain expression | Brain abnormalities in humans                                                                                      |
|---------|-----------------------------------|-------------------------|----------------------------|--------------------------------------------------------------------------------------------------------------------------|------------------------------|------------------|--------------------------------------------------------------------------------------------------------------------|
| ARL13B  | Arf like small GTPases            | ND                      | Cilium                     | Cilia maintenance, ciliary signal transduction <sup>40</sup>                                                             | JBTS                         | Yes              | Cerebellar vermis hypoplasia, deepened interpeduncular fossa, elongated superior cerebellar peduncles <sup>3</sup> |
| CSPP1   | Centrosomal protein               | ND                      | Basal body and axoneme     | Ciliary length and ciliogenesis <sup>41</sup>                                                                            | JBTS                         | Yes              |                                                                                                                    |
| TMEM138 | Tetraspan transmembrane protein   | ND                      | Transition zone and cilium | Ciliogenesis centrosome and ciliary membrane composition <sup>14-18</sup> , ciliary signal transduction <sup>18,42</sup> | JBTS                         | Yes              |                                                                                                                    |
| TMEM237 | Tetraspan transmembrane protein   | ND                      | Transition zone            | Ciliogenesis, WNT signaling                                                                                              | JBTS                         | Yes              |                                                                                                                    |
| INPP5E  | Lipid 5-phosphatase               | ND                      | Cilium                     | Cilia maintenance, ciliary signal transduction <sup>43</sup>                                                             | JBTS                         | Yes              |                                                                                                                    |
| NPHP2   | Nephrocystin family               | Transition zone complex | Transition zone            | Ciliogenesis centrosome and ciliary membrane composition <sup>14-18</sup> , ciliary signal transduction <sup>18</sup>    | NPHP, SLS                    | Yes              | Cerebellar vermis hypoplasia, enlarged fourth ventricle <sup>44,45</sup>                                           |
| NPHP3   | Nephrocystin family               | Transition zone complex | Transition zone            |                                                                                                                          | NPHP, MKS, SLS               | Yes              |                                                                                                                    |
| NPHP4   | Nephrocystin family               | Transition zone complex | Transition zone            |                                                                                                                          | NPHP, SLS                    | Yes              |                                                                                                                    |
| NPHP5   | Nephrocystin family               | ND                      | Basal body                 | Ciliogenesis <sup>46</sup>                                                                                               | NPHP, LCA, SLS               | Yes              |                                                                                                                    |
| NPHP7   | Nephrocystin family, Glis2 family | ND                      | Basal body                 | Ciliary signal transduction <sup>47</sup>                                                                                | NPHP                         | Yes              |                                                                                                                    |
| NPHP9   | Nephrocystin family               | ND                      | Basal body                 | Ciliary signal transduction <sup>48</sup>                                                                                | NPHP                         | Yes              |                                                                                                                    |
| ATXN10  | Ataxin family                     | Transition zone complex | Transition zone            | Ciliary signal transduction <sup>45</sup>                                                                                | NPHP, spinocerebellar ataxia | Yes              |                                                                                                                    |
| CEP83   | Centrosomal protein               | ND                      | Basal body                 | Ciliogenesis <sup>49</sup>                                                                                               | NPHP                         | Yes              | Hydrocephalus <sup>49</sup>                                                                                        |
| C5orf42 | ND                                | ND                      | ND                         | ND <sup>50</sup>                                                                                                         | OFDVI, JBTS                  | Yes              | Elongated superior cerebellar peduncle, thin corpus callosum, cortical atrophy <sup>50</sup>                       |

|         |                           |                                |                            |                                                                    |                            |     |                                                                                                                                                |
|---------|---------------------------|--------------------------------|----------------------------|--------------------------------------------------------------------|----------------------------|-----|------------------------------------------------------------------------------------------------------------------------------------------------|
| SCLT1   | ND                        | ND                             | Basal body                 | Ciliogenesis <sup>51</sup>                                         | OFDIX                      | Yes | Microcephaly, corpus callosal agenesis, pachygyria, cerebellar vermis agenesis <sup>51</sup>                                                   |
| TBC1D32 | TBC1 domain family        | ND                             | Basal body                 | Ciliogenesis <sup>51</sup>                                         | OFDIX                      | Yes |                                                                                                                                                |
| PKD1    | Polycystin family         | ND                             | Cilium                     | Ciliary signal transduction <sup>52</sup>                          | PKD                        | Yes | Brain aneurysms <sup>53</sup>                                                                                                                  |
| PKD2    | Polycystin family         | ND                             | Cilium                     | Ciliary signal transduction <sup>52</sup>                          | PKD                        | Yes |                                                                                                                                                |
| PKHD1   | Fibrocystin               | ND                             | Cilium                     | Ciliary signal transduction                                        | PKD                        | Yes |                                                                                                                                                |
| DNAHC5  | Dynein protein family     | Motor protein complex          | Cilium                     | Cilia maintenance                                                  | PCD                        | Yes | Hydrocephalus <sup>54</sup>                                                                                                                    |
| DNAI1   | Dynein protein family     | Motor protein complex          | Cilium                     | Cilia maintenance <sup>55</sup>                                    | PCD                        | Yes | ND                                                                                                                                             |
| CEP120  | Centriolar protein        | ND                             | Basal body                 | Ciliogenesis <sup>56</sup>                                         | JATD                       | Yes | Cerebellar vermis hypoplasia, deepened interpeduncular fossa, elongated superior cerebellar peduncles, ventricle dilatation <sup>3,30,57</sup> |
| NEK1    | NIMA-related kinase       | ND                             | Basal body                 | Ciliogenesis, cilia maintenance                                    | PKD, SRP <sup>58,59</sup>  | Yes |                                                                                                                                                |
| DYNC2H1 | Dynein protein family     | Motor protein complex          | Cilium                     | Cilia maintenance                                                  | JATD, SRP <sup>58,60</sup> | Yes |                                                                                                                                                |
| IFT139  | IFT                       | IFT-B                          | Transition zone and cilium | Ciliogenesis, Shh signal transduction <sup>61</sup>                | JATD, NPH                  | Yes |                                                                                                                                                |
| CENPF   | Centromere protein family | Centromere-kinetochore complex | Centrosome                 | Ciliogenesis                                                       | Microcephaly <sup>62</sup> | Yes | Microcephaly, cerebellar vermis hypoplasia, corpus callosal agenesis                                                                           |
| KATNB1  | Katanin family            | Microtubule-severing complex   | Centrosome                 | Ciliogenesis                                                       | Microcephaly <sup>63</sup> | Yes | Microcephaly, thinning of corpus callosum <sup>63</sup>                                                                                        |
| IFT88   | IFT                       | IFT-B                          | Basal body and cilium      | Ciliogenesis, Shh signal transduction, mitotic spindle orientation | Anosmic <sup>64</sup>      | Yes | ND                                                                                                                                             |
| AIPL1   | LCA                       | ND                             | Cilium                     | ND                                                                 | LCA <sup>65</sup>          | No  | ND                                                                                                                                             |
| LCA5    | LCA                       | ND                             | Basal body and cilium      | Ciliary protein transport                                          | LCA <sup>65,66</sup>       | No  | ND                                                                                                                                             |

|                   |                                                         |                    |                                  |                                                                 |                      |     |                                                                      |                                                                                                                |
|-------------------|---------------------------------------------------------|--------------------|----------------------------------|-----------------------------------------------------------------|----------------------|-----|----------------------------------------------------------------------|----------------------------------------------------------------------------------------------------------------|
| GUCY2D            | Guanylate cyclase                                       | ND                 | Cilium                           | ND                                                              | LCA <sup>65</sup>    | No  | ND                                                                   |                                                                                                                |
| NMNAT1            | Adenylyl transferase 1                                  | ND                 | ND                               | ND                                                              | LCA <sup>65</sup>    | No  | ND                                                                   |                                                                                                                |
| RD3               | Retinal protein                                         | ND                 | Photoreceptor cells              | Protein transport                                               | LCA <sup>65</sup>    | No  | ND                                                                   |                                                                                                                |
| RDH12             | Retinol dehydrogenase                                   | ND                 | Photoreceptor cells              | ND                                                              | LCA <sup>65,67</sup> | No  | ND                                                                   |                                                                                                                |
| RPE65             | Retinoid isomerohydrolase                               | ND                 | Retinal pigment epithelial cells | ND                                                              | LCA <sup>65</sup>    | No  | ND                                                                   |                                                                                                                |
| LRAT              | Lecithin retinol acyltransferase                        | ND                 | Retinal pigment epithelial cells | ND                                                              | LCA <sup>65</sup>    | No  | ND                                                                   |                                                                                                                |
| IMPDH1            | IMP-dehydrogenase                                       | ND                 | Photoreceptor cells              | ND                                                              | LCA <sup>65,68</sup> | Yes | Absent septum pellucidum, cerebellar vermis hypoplasia <sup>69</sup> |                                                                                                                |
| CRX               | Cone-rod homeobox protein                               | ND                 | Eye ciliary margin               | ND                                                              | LCA <sup>65,70</sup> | Yes |                                                                      |                                                                                                                |
| TULP1             | Tubby like protein 1                                    | ND                 | Photoreceptor cells              | Photoreceptor protein transport                                 | LCA <sup>65,71</sup> | Yes |                                                                      |                                                                                                                |
| KCNJ13            | Inwardly rectifying potassium channel family of protein | ND                 | Photoreceptor cells              | ND                                                              | LCA <sup>65,72</sup> | Yes |                                                                      |                                                                                                                |
| CRB1              | The Crumbs family                                       | The Crumbs complex | Basal body                       | Cilia maintenance                                               | LCA <sup>65,73</sup> | Yes |                                                                      |                                                                                                                |
| MERTK             | Tyrosine kinase                                         | ND                 | Retinal pigment epithelial cells | ND                                                              | LCA <sup>65</sup>    | Yes |                                                                      |                                                                                                                |
| SPATA7            | LCA                                                     | ND                 | Retina                           | ND                                                              | LCA <sup>65,74</sup> | Yes |                                                                      |                                                                                                                |
| RPGRIP1           | GTPase regulator interacting protein                    | ND                 | Photoreceptor cells              | ND                                                              | LCA <sup>65</sup>    | Yes |                                                                      |                                                                                                                |
| POC1B             | Centriolar protein                                      | ND                 | Basal body                       | Ciliogenesis <sup>75</sup>                                      | LCA, JBTS, PKD       | Yes |                                                                      | Cerebellar vermis hypoplasia, deepened interpeduncular fossa, elongated superior cerebellar peduncles          |
| CCDC28B (MGC1203) | Coiled coil domain-containing protein                   | ND                 | Basal body                       | Ciliogenesis, ciliary length regulation and signal transduction | BBS                  | Yes |                                                                      | Frontal cortical dysplasia, microcephaly, cortical and cerebellar atrophy, cortical heterotopias <sup>10</sup> |
| IFT172            | IFT                                                     | IFT-B              | Transition zone and cilium       | Cilioary protein transport, ciliogenesis <sup>76</sup>          | BBS                  | Yes |                                                                      |                                                                                                                |

|       |                                    |             |                            |                                                       |                   |     |                                                            |
|-------|------------------------------------|-------------|----------------------------|-------------------------------------------------------|-------------------|-----|------------------------------------------------------------|
| IFT27 | IFT                                | IFT-B       | Transition zone and cilium | Ciliary protein transport, ciliogenesis <sup>77</sup> | BBS               | Yes |                                                            |
| BBIP1 | ND                                 | BBSome      | Basal body                 | BBSome complex assembly <sup>78</sup>                 | BBS               | Yes |                                                            |
| CYS1  | Cystin                             | ND          | Cilium                     | ND                                                    | ARPKD             | Yes | Brain aneurysms <sup>53</sup>                              |
| KIF11 | Kinesin family                     | ND          | Cilium                     | Ciliary signal transduction <sup>79</sup>             | Microcephaly      | Yes | Microcephaly                                               |
| KIF14 | Kinesin family                     | ND          | Cilium                     | Ciliary signal transduction <sup>79</sup>             | Microcephaly      | Yes | Microcephaly                                               |
| KIF2A | Kinesin family                     | ND          | Cilium                     | Ciliary signal transduction <sup>79</sup>             | Microcephaly      | Yes | Microcephaly                                               |
| KIF5C | Kinesin family                     | ND          | Cilium                     | Ciliary signal transduction <sup>79</sup>             | Microcephaly      | Yes | Microcephaly                                               |
| EVC   | Ellis van Creveld syndrome protein | EVC complex | Cilium                     | Ciliary signal transduction                           | EVC               | Yes | Hypoplastic ventricle and hydrocephalus <sup>80</sup>      |
| EVC2  | Ellis van Creveld syndrome protein | EVC complex | Cilium                     | Ciliary signal transduction                           | EVC               | Yes |                                                            |
| RTTN  | ND                                 | ND          | Basal body <sup>81</sup>   | Cilia maintenance <sup>81</sup>                       | PMG <sup>81</sup> | Yes | Polymicrogyria, lateral ventricle dilatation <sup>81</sup> |

AIPL1, Aryl hydrocarbon receptor interacting protein-like 1; ARL13B, ADP-ribosylation factor-like protein 13B; ATXN10, ataxin10; BBIP1, BBSome interacting protein 1; C5orf42, chromosome 5 open reading frame 42; CCDC28B, Coiled coil domain-containing protein 28B; CENPF, Centromere protein F; CEP83, centrosomal protein 83kDa; CEP120, centrosomal protein 120kDa; CRB1, Crumbs family member 1; CRX, Cone-rod homeobox protein; CSPP1, centrosome and spindle pole associated protein 1; CYS1, Cystin 1; DNAH5, dynein, axonemal, heavy chain 5; DNAI1, dynein, axonemal, intermediate chain 1; DYNC2H1, dynein, cytoplasmic 2, heavy chain 1; EVC, Ellis van Creveld syndrome; EVC2, Ellis van Creveld syndrome 2; GUCY2D, Guanylate cyclase 2D; IFT27, intraflagellar transport 27; IFT88, intraflagellar transport 88; IFT139, intraflagellar transport 139; IFT172, intraflagellar transport 172; IMPDH1, IMP (inosine 5'-monophosphate) dehydrogenase 1; INPP5E, Inositol polyphosphate-5-phosphatase; KATNB1, katanin p80 subunit B1; KCNJ13, potassium inwardly-rectifying channel, subfamily J, member 13; KIF11, Kinesin family member 11; KIF14, Kinesin family member 14; KIF2A, Kinesin family member 2A; KIF5C, Kinesin family member 5C; LCA5, Leber congenital amaurosis 5; LRAT, lecithin retinol acyltransferase (phosphatidylcholine--retinol O-acyltransferase); MERTK, c-met proto-oncogene tyrosine kinase; NEK1, NIMA (never in mitosis gene a)-related kinase 1; NMNAT1, nicotinamide nucleotide adenyltransferase 1; NPHP, Nephronophthisis; PKD, Polycystic kidney disease; PKHD1, Polycystic kidney and hepatic disease 1; RD3, Retinal degeneration 3; RTTN, rotatin; SCLT1, sodium channel and clathrin linker 1; SPATA7, spermatogenesis associated 7; TBC1D32, TBC1 domain family, member 32; TMEM, transmembrane protein; RPE65, Retinal pigment epithelium-specific protein 64kDa; RPGRIP1, retinitis pigmentosa GTPase regulator interacting protein 1; ARPKD, autosomal recessive polycystic kidney disease; BBS, Bardet-Biedl syndrome; JATD, Jeune asphyxiating thoracic dystrophy; JBTS, Joubert syndrome; LCA, Leber congenital amaurosis; MKS, Meckel-gruber syndrome; MKKS, McKusick-Kauffman syndrome; NPH, nephronophthisis; PCD, Primary ciliary dyskinesia; PKD, Polycystic kidney disorder; PMD, Polymicrogyria; SLS, Senior-Loken Syndrome; SRP, Short-rib-polydactyly syndrome; ND, not defined.

**Table S3. Human MRI phenotypes associated with ciliopathy gene mutations**

| Gene                            | Human MRI phenotypes                                                                                                                                                                                                          |                                                                                                                                                   |
|---------------------------------|-------------------------------------------------------------------------------------------------------------------------------------------------------------------------------------------------------------------------------|---------------------------------------------------------------------------------------------------------------------------------------------------|
| AHI1                            | Molar tooth sign (MTS), cortical polymicrogyria, cerebellar vermis hypoplasia, corpus callosal agenesis <sup>4</sup>                                                                                                          |                                                                                                                                                   |
| ALMS1                           | Enlarged ventricle, gray and white matter atrophy, brain lesions <sup>25</sup>                                                                                                                                                |                                                                                                                                                   |
| ARL13B                          | Molar tooth sign (MTS), cerebellar vermis hypoplasia, elongated superior cerebellar peduncle <sup>82,97</sup>                                                                                                                 |                                                                                                                                                   |
| ATXN10                          | Cerebral atrophy <sup>45</sup>                                                                                                                                                                                                |                                                                                                                                                   |
| BBS2                            | Cerebral ventricular dilatation, neuronal ectopias <sup>83</sup>                                                                                                                                                              |                                                                                                                                                   |
| BBS4                            | Cerebral ventricular dilatation, neuronal ectopias, corpus callosal agenesis <sup>83</sup>                                                                                                                                    |                                                                                                                                                   |
| BBS6                            | Corpus callosal hypoplasia <sup>83</sup>                                                                                                                                                                                      |                                                                                                                                                   |
| BUBR1                           | Microcephaly, brain hypoplasia, enlarged fourth ventricle and posterior fossa, cerebellar vermis hypoplasia <sup>26</sup>                                                                                                     |                                                                                                                                                   |
| C5orf42                         | Molar tooth sign (MTS), enlarged superior cerebellum peduncle, cortical atrophy, thin corpus callosum <sup>50</sup>                                                                                                           |                                                                                                                                                   |
| CC2D2A                          | Molar tooth sign (MTS), cerebellar vermis hypoplasia, thickened superior cerebellar peduncle <sup>22</sup>                                                                                                                    |                                                                                                                                                   |
| CEP41                           | Molar tooth sign (MTS), cerebellar vermis hypoplasia, thickened superior cerebellar peduncle <sup>5</sup>                                                                                                                     |                                                                                                                                                   |
| CEP120                          | Molar tooth sign (MTS), hydrocephalus, cerebellar hypoplasia <sup>56</sup>                                                                                                                                                    |                                                                                                                                                   |
| CEP83                           | Hydrocephalus <sup>49</sup>                                                                                                                                                                                                   |                                                                                                                                                   |
| CEP290                          | Molar tooth sign (MTS), thickened and maloriented superior cerebellar peduncles and cerebellar vermis hypoplasia <sup>21</sup>                                                                                                |                                                                                                                                                   |
| CSPP1                           | Molar tooth sign (MTS), thickened and maloriented superior cerebellar peduncles and cerebellar vermis hypoplasia, occipital encephalocele, cortical heterotopia <sup>41</sup>                                                 |                                                                                                                                                   |
| FTO                             | Brain atrophy <sup>38</sup>                                                                                                                                                                                                   |                                                                                                                                                   |
| INPP5E                          | Molar tooth sign (MTS), cerebellar vermis hypoplasia, elongated superior cerebellar peduncle <sup>84</sup>                                                                                                                    |                                                                                                                                                   |
| KATNB1                          | Microcephaly, enlarged lateral ventricles, thinning of corpus callosum, simplified gyri <sup>63</sup>                                                                                                                         |                                                                                                                                                   |
| KIF7                            | Molar tooth sign (MTS), hydrocephalus, corpus callosal agenesis, deep interpeduncular fossa and stretched cerebellar peduncles <sup>31</sup>                                                                                  |                                                                                                                                                   |
| KIF14                           | Cerebral hypoplasia, cerebellar hypoplasia, corpus callosal agenesis, cerebellar vermis agenesis <sup>79</sup>                                                                                                                |                                                                                                                                                   |
| MKS3                            | Molar tooth sign (MTS), malformation of the posterior fossa, with severe vermis hypoplasia or vermis aplasia, global cerebellar hypoplasia associated with subtentorial cystic dilatation of the cisterna magna <sup>85</sup> |                                                                                                                                                   |
| NPHP1                           | Inferior vermis hypoplasia, molar tooth sign (MTS), elongated superior cerebellar peduncle <sup>86,87</sup>                                                                                                                   |                                                                                                                                                   |
| NPHP8                           | Molar tooth sign (MTS), occipital encephalocele, anencephaly <sup>88</sup>                                                                                                                                                    |                                                                                                                                                   |
| OFD1                            | Corpus callosal agenesis, hippocampal hypoplasia, interhemispheric cysts, periventricular heterotopia, molar tooth sign (MTS), cerebellar vermis hypoplasia <sup>35</sup>                                                     |                                                                                                                                                   |
| POC1B                           | Molar tooth sign (MTS), cerebellar vermis hypoplasia <sup>75</sup>                                                                                                                                                            |                                                                                                                                                   |
| RTTN                            | Polymicrogyria <sup>81</sup>                                                                                                                                                                                                  |                                                                                                                                                   |
| SCLT1                           | Corpus callosal agenesis, microcephaly, inferior cerebellar vermis agenesis, pachygyria <sup>51</sup>                                                                                                                         |                                                                                                                                                   |
| TBC1D32                         | Corpus callosal agenesis, microcephaly, inferior cerebellar vermis agenesis, pachygyria <sup>51</sup>                                                                                                                         |                                                                                                                                                   |
| TCTN2                           | Molar tooth sign (MTS), cerebellar vermis aplasia <sup>45</sup>                                                                                                                                                               |                                                                                                                                                   |
| TMEM237                         | Molar tooth sign (MTS), cerebellar vermis hypoplasia, elongated superior cerebellar peduncle, posterior encephalocele, abnormal shaped fourth ventricle <sup>89,90</sup>                                                      |                                                                                                                                                   |
| Functional gene modules         | Ciliary localization                                                                                                                                                                                                          | Human clinical manifestations <sup>^</sup>                                                                                                        |
| BBSome (BBS1, 2, 4, 5, 7, 8, 9) | Axoneme                                                                                                                                                                                                                       | Ataxia, rod-cone dystrophy, cerebellar atrophy, corpus callosal agenesis, ventricle enlargement, intellectual disabilities <sup>10,45,83,91</sup> |

|                            |                       |                                                                                                   |
|----------------------------|-----------------------|---------------------------------------------------------------------------------------------------|
| NPHP1-4-8 module           | Transition zone       | Ataxia, molar tooth sign (MTS), intellectual disabilities <sup>15,45,87,92</sup>                  |
| NPHP5-6, ATXN10 module     | Basal body/Centrosome | Ataxia, molar tooth sign (MTS), cerebellar atrophy, intellectual disabilities <sup>45,46,88</sup> |
| MKS1-6, TCTN1, 2, 3 module | Transition zone       | Occipital encephalocele, molar tooth sign (MTS), intellectual disabilities <sup>14,15,20,45</sup> |

AHI1, Abelson helper integration site 1; ALMS1, Alstrom syndrome 1; ARL13B, ADP-ribosylation factor-like protein 13B; ATXN10, Ataxin10; BBS2, Bardet-Biedl syndrome 2; BBS4, Bardet-Biedl syndrome 4; BBS6, Bardet-Biedl syndrome 6; BUBR1, Bub1-related kinase; C5orf42, chromosome 5 open reading frame 42; CC2D2A, coiled-coil and C2 domain containing 2A; CEP41, Centrosomal protein 41; CEP83, Centrosomal protein 83; CEP120, Centrosomal protein 120; CEP290, Centrosomal protein 290; CSPP1, centrosome and spindle pole associated protein 1; FTO, fat mass and obesity associated; INPP5E, Inositol polyphosphate-5-phosphatase; KATNB1, Katanin p80 subunit B1; KIF7, Kinesin family member 7; KIF14, Kinesin family member 14; MKS3, Meckle Syndrome 3; NPHP, Nephronophthisis; OFD1, Oral-facial-digital syndrome 1; POC1B, POC centriolar protein B; RTTN, rotatin; SCLT1, sodium channel and clathrin linker 1; TBC1D32, TBC1 domain family, member 32; TCTN2, tectonic family member 2; TMEM237, transmembrane protein 237. <sup>^</sup>, Only the clinical manifestations common to mutations in all members of the complex are listed.



**Table S4. shRNA library of ciliopathy genes**

| <b>Gene Name</b> | <b>Accession No.</b> | <b>shRNA constructs</b>                                                                      | <b>Source</b>                 | <b>Knockdown efficiency</b> |
|------------------|----------------------|----------------------------------------------------------------------------------------------|-------------------------------|-----------------------------|
| AHI1             | NM_026203.2          | TRCN0000191207<br>TRCN0000202060<br>TRCN0000190390<br>TRCN0000201363<br>TRCN0000192100       | GE<br>Dharmacon               | Pool1<br>Yes (78%)          |
|                  |                      |                                                                                              |                               | Pool 2<br>Yes (76%)         |
| ALMS1            | NM_145223.2          | TRCN0000183842<br>TRCN0000183730<br>TRCN0000180565<br>TRCN0000183191                         | GE<br>Dharmacon               | Pool1<br>Yes (87%)          |
|                  |                      |                                                                                              |                               | Pool 2<br>Yes (79%)         |
| B9D1             | NM_013717.2          | V3LMM_505274<br>V3LMM_505275<br>V3LMM_505276<br>V3LMM_505277                                 | GE<br>Dharmacon               | Pool1<br>No (5%)            |
|                  |                      |                                                                                              |                               | Pool 2<br>No (8%)           |
| BBS1             | NM_001033128         | V3LMM_449353<br>V3LMM_449358<br>V3LMM_449357<br>V3LMM_449355<br>V3LMM_449354<br>V3LMM_449356 | GE<br>Dharmacon               | Pool1<br>Yes (91%)          |
|                  |                      |                                                                                              |                               | Pool 2<br>Yes (79%)         |
| BBS2             | NM_026116            | TRCN0000177554<br>TRCN0000176447<br>TRCN0000177437<br>TRCN0000182334                         | UNC Gene<br>Therapy<br>Center | Pool1<br>Yes (75%)          |
|                  |                      |                                                                                              |                               | Pool 2<br>Yes (82%)         |
| BBS3 (ARL6)      | NM_019665            | TRCN0000100844<br>TRCN0000100842<br>TRCN0000100841<br>TRCN0000100840<br>TRCN0000100843       | UNC Gene<br>Therapy<br>Center | Pool1<br>Yes (76%)          |
|                  |                      |                                                                                              |                               | Pool 2<br>Yes (82%)         |
| BBS4             | NM_175325            | V2LMM_88124<br>V2LMM_88126<br>V2LMM_227338<br>V2LMM_88128<br>V2LMM_197617                    | GE<br>Dharmacon               | Pool1<br>Yes (81%)          |
|                  |                      |                                                                                              |                               | Pool 2<br>Yes (78%)         |
| BBS5             | NM_028284            | V2LMM_40947<br>V2LMM_38072<br>V3LMM_513848                                                   | GE<br>Dharmacon               | Pool1<br>Yes (87%)          |
|                  |                      |                                                                                              |                               | Pool 2<br>Yes (82%)         |
| BBS6 (MKKS)      | NM_021527            | V2LMM_73798<br>V2LMM_66409<br>V2LMM_66373                                                    | GE<br>Dharmacon               | Pool1<br>No (16%)           |
|                  |                      |                                                                                              |                               | Pool 2<br>No (22%)          |
| BBS7             | NM_027810.3          | V2LMM_54540<br>V3LMM_498514                                                                  | GE<br>Dharmacon               | Pool1<br>Yes (76%)          |

|                   |                |                                                                                        |                 |                     |
|-------------------|----------------|----------------------------------------------------------------------------------------|-----------------|---------------------|
|                   |                | V3LMM_498516<br>V3LMM_498518<br>V3LMM_498517                                           |                 | Pool 2<br>Yes (72%) |
| BBS8 (TTC8)       | NM_029553.3    | TRCN0000113210<br>TRCN0000113211<br>TRCN0000113212<br>TRCN0000113213<br>TRCN0000113214 | GE<br>Dharmacon | Pool1<br>No (34%)   |
|                   |                |                                                                                        |                 | Pool 2<br>Yes (75%) |
| BBS9              | NM_178415.1    | TRCN0000182387<br>TRCN0000182069<br>TRCN0000178683<br>TRCN0000182647<br>TRCN0000181485 | GE<br>Dharmacon | Pool1<br>Yes (70%)  |
|                   |                |                                                                                        |                 | Pool 2<br>Yes (72%) |
| BBS10             | NM_027914      | V2LMM_99446<br>V2LMM_99447<br>V2LMM_99445<br>V2LMM_99444<br>V2LMM_197526               | GE<br>Dharmacon | Pool1<br>Yes (70%)  |
|                   |                |                                                                                        |                 | Pool 2<br>Yes (75%) |
| BBS11<br>(TRIM32) | NM_053084.2    | TRCN0000040832<br>TRCN0000040831<br>TRCN0000040830<br>TRCN0000040829<br>TRCN0000040828 | GE<br>Dharmacon | Pool1<br>Yes (77%)  |
|                   |                |                                                                                        |                 | Pool 2<br>Yes (83%) |
| BBS12             | NM_001008502.2 | TRCN0000178910<br>TRCN0000179579<br>TRCN0000179253<br>TRCN0000183292                   | GE<br>Dharmacon | Pool1<br>Yes (90%)  |
|                   |                |                                                                                        |                 | Pool 2<br>Yes (73%) |
| BUBR1<br>(BUB1B)  | NM_009773.3    | sc-37543-SH                                                                            | Santa Cruz      | Pool1<br>Yes (79%)  |
|                   |                |                                                                                        |                 | Pool 2<br>Yes (87%) |
| CEP41             | NM_031998.2    | sc-142283-SH                                                                           | Santa Cruz      | Pool1<br>Yes (83%)  |
|                   |                |                                                                                        |                 | Pool 2<br>Yes (87%) |
| CEP290            | NM_146009.2    | V2LMM_205703<br>V2LMM_25106<br>V2LMM_23922                                             | GE<br>Dharmacon | Pool1<br>No (26%)   |
|                   |                |                                                                                        |                 | Pool 2<br>No (12%)  |
| CC2D2A            | NM_172274.1    | TRCN0000181757<br>TRCN0000197491<br>TRCN0000197895<br>TRCN0000178278<br>TRCN0000177905 | GE<br>Dharmacon | Pool1<br>Yes (76%)  |
|                   |                |                                                                                        |                 | Pool 2<br>Yes (89%) |
| FTO               | NM_011936      | TRCN0000183897<br>TRCN0000179651<br>TRCN0000180978<br>TRCN0000178985                   | GE<br>Dharmacon | Pool1<br>Yes (78%)  |
|                   |                |                                                                                        |                 | Pool 2<br>Yes (79%) |

|                     |                |                                                                                        |                 |                     |
|---------------------|----------------|----------------------------------------------------------------------------------------|-----------------|---------------------|
| IFT80               | NM_026641.2    | TRCN0000190083<br>TRCN0000193055<br>TRCN0000191159<br>TRCN0000190186<br>TRCN0000191678 | GE<br>Dharmacon | Pool1<br>Yes (71%)  |
|                     |                |                                                                                        |                 | Pool 2<br>Yes (77%) |
| KIF7                | NM_001291222.1 | TRCN0000090441<br>TRCN0000090439<br>TRCN0000116760                                     | GE<br>Dharmacon | Pool1<br>Yes (86%)  |
|                     |                |                                                                                        |                 | Pool2<br>Yes (81%)  |
| MKS1                | NM_017777.3    | TRCN0000136854<br>TRCN0000138085<br>TRCN0000136766<br>TRCN0000137356<br>TRCN0000137209 | GE<br>Dharmacon | Pool1<br>Yes (86%)  |
|                     |                |                                                                                        |                 | Pool 2<br>Yes (73%) |
| MKS3                | NM_177861      | TRCN0000125984<br>TRCN0000125985<br>TRCN0000125986<br>TRCN0000125987<br>TRCN0000125988 | GE<br>Dharmacon | Pool1<br>Yes (73%)  |
|                     |                |                                                                                        |                 | Pool 2<br>Yes (79%) |
| NPHP1               | NM_016902.3    | TRCN0000192281<br>TRCN0000200670<br>TRCN0000201440<br>TRCN0000190911                   | GE<br>Dharmacon | Pool1<br>Yes (76%)  |
|                     |                |                                                                                        |                 | Pool 2<br>Yes (82%) |
| NPHP8<br>(RPGRIP1L) | NM_173431.2    | TRCN0000106076<br>TRCN0000106077<br>TRCN0000106078<br>TRCN0000106079                   | GE<br>Dharmacon | Pool1<br>Yes (77%)  |
|                     |                |                                                                                        |                 | Pool 2<br>Yes (71%) |
| OFD1                | NM_177429.3    | TRCN0000191091<br>TRCN0000191237<br>TRCN0000191531<br>TRCN0000192215<br>TRCN0000191532 | GE<br>Dharmacon | Pool1<br>Yes (79%)  |
|                     |                |                                                                                        |                 | Pool 2<br>Yes (73%) |
| TCTN2               | NM_026486.3    | V2LMM_14487<br>V2LMM_12203<br>V3LMM_473359                                             | GE<br>Dharmacon | Pool1<br>Yes (86%)  |
|                     |                |                                                                                        |                 | Pool 2<br>Yes (74%) |
| TMEM216             | NM_001277860.1 | sc-154446-SH                                                                           | Santa Cruz      | Pool1<br>Yes (75%)  |
|                     |                |                                                                                        |                 | Pool 2<br>Yes (79%) |
| TUB                 | NM_021885      | TRCN0000034508<br>TRCN0000034507<br>TRCN0000034506<br>TRCN0000034505<br>TRCN0000034504 | GE<br>Dharmacon | Pool1<br>Yes (79%)  |
|                     |                |                                                                                        |                 | Pool 2<br>Yes (77%) |

**Table S5. Quantitative realtime-PCR primers**

| <b>Gene Name</b>  | <b>Realtime-PCR primers sequences</b>                             |
|-------------------|-------------------------------------------------------------------|
| AHI1              | Forward: CCGGTGGTCCGCAAAG<br>Reverse: GGCGGCTTCTGCTTGGT           |
| ALMS1             | Forward: TCTGGTGCTTGTGATACGAAAGA<br>Reverse: AGGCCCGGAGTGAATGTG   |
| B9D1              | Forward: TGCAATGGCTGCAGCAA<br>Reverse: CCTGCCCGGTGATCATGA         |
| BBS1              | Forward: GGCTGCGGCGTCTTCA<br>Reverse: CATTAGAATTGGCTTCGTTGCT      |
| BBS2              | Forward: TGAAACTGCGCCACAAAATC<br>Reverse: CGTCGTAGCGCCCTATGG      |
| BBS3<br>(ARL6)    | Forward: TTAAAGACAAGCCGTGGCATATT<br>Reverse: TCCTGCAGGCCTTCTCCTT  |
| BBS4              | Forward: ACGTGAGGCCTCGCATGTA<br>Reverse: GAGTAACGGGCTTTCATCGTTT   |
| BBS5              | Forward: ATCGCAGTGCACAGAGCATA<br>Reverse: CAGGTTACGATCTTGTTGCTTA  |
| BBS6<br>(MKKS)    | Forward: GAATACACGTCTGCCCGTAAGAT<br>Reverse: AAGCTCCCGCAAAGGAAAG  |
| BBS7              | Forward: GAAGCAAGCAGAGCCTGATCA<br>Reverse: TGATTACATGTGGGACGTCCAT |
| BBS8<br>(TTC8)    | Forward: GGGCACATAGCTGTGGGAAT<br>Reverse: GGGCCAGCCTGAAGCAT       |
| BBS9              | Forward: GCAGCCTCACCCCTCTTACA<br>Reverse: AAGTCCGGATGCTCACAGAGA   |
| BBS10             | Forward: CGGTTCTGGGTCTTGTTGAAC<br>Reverse: CTGCCGAAGCATCTTAAATGC  |
| BBS11<br>(TRIM32) | Forward: GGACCTCTTGACGGGAATTC<br>Reverse: CCATCCTCTGGCACATCTTCA   |
| BBS12             | Forward: TTCCTCTTGGATGGCCTCAT<br>Reverse: GCCAGGGACTTCAGCACAGT    |

|                     |                                                                        |
|---------------------|------------------------------------------------------------------------|
| BUBR1<br>(BUB1B)    | Forward: GGCCATGTTGTTTGGTACCAGTA<br>Reverse: TTCGCTGTGTTGGAGAAGATTC    |
| CEP41               | Forward: CGCTCCCAACTTGGTCCTT<br>Reverse: GGTCCAGCCCGTGTAGCAT           |
| CEP290              | Forward: GATGCTGTCATGGACCAGATCA<br>Reverse: AGAAGATCCGTGAGCTCTCGAA     |
| CC2D2A              | Forward: GGTGGCACGCACCAATG<br>Reverse: ACTTACTCCCAGGCTCCTGTATCA        |
| FTO                 | Forward: TCTCCTAGAATTCCCCACTCATAGA<br>Reverse: TTGGGAACTGGGTGCTTCA     |
| IFT80               | Forward: GCTCCCTGGTGCACATCAG<br>Reverse: TTGGAGCTGCTCACATACTCATG       |
| KIF7                | Forward: GCCGAGGCAGCCACATC<br>Reverse: GCATTCCCTCCCAGAGAGTCT           |
| MKS1                | Forward: CCCCCTGCGCAACCT<br>Reverse: TTGCTTGATGTGATTCTTTGCA            |
| MKS3                | Forward: CCTTAAGAGAGAGGCGGAAAATT<br>Reverse: CGTCTGCCCATCCGTGTT        |
| NPHP1               | Forward: CCGCCTCTGCCTGTTTGA<br>Reverse: ACACGGCTCGAACTGTATGGA          |
| NPHP8<br>(RPGRIP1L) | Forward: GCAGATGAAAGTGCAGATTGCT<br>Reverse: GACTTCGGTTTTGTCTGTAAGATCAG |
| OFD1                | Forward: GGGCGTGATGCCATGAA<br>Reverse: GGGATGACTGCGCTCTCATT            |
| TCTN2               | Forward: TTCCCCCGGCTTTGAAG<br>Reverse: GTAAGTGGCATCCGCGAAGT            |
| TMEM216             | Forward: GTGCACGTACATCTGTCCTACATG<br>Reverse: GCCCAAGAGCCCACCATTA      |
| TUB                 | Forward: GCCTCCCCTTCTCTGTATTCT<br>Reverse: CACCTGGCATCCTGAAATCC        |

**Table S6. Ciliopathy genes and cortical progenitor development**

| Gene    | Radial glial Scaffold organization | Apical $\beta$ -catenin enrichment | Basal endfeet morphology | Apical endfeet morphology | Changes in % of PH3 <sup>+</sup> /GFP <sup>+</sup> cells (Fold basal) | Changes in % of BrdU <sup>+</sup> /GFP <sup>+</sup> cells (Fold basal) | Changes in % of Tbr2 <sup>+</sup> /GFP <sup>+</sup> cells (Fold basal) | Changes in % of BrdU <sup>+</sup> /Tbr2 <sup>+</sup> /GFP <sup>+</sup> cells (Fold basal) |
|---------|------------------------------------|------------------------------------|--------------------------|---------------------------|-----------------------------------------------------------------------|------------------------------------------------------------------------|------------------------------------------------------------------------|-------------------------------------------------------------------------------------------|
| BBS1    | Disrupted                          | Normal                             | Disrupted                | Normal                    | •                                                                     | •                                                                      | •                                                                      | •                                                                                         |
| BBS7    | Disrupted                          | Normal                             | Normal                   | Normal                    | •                                                                     | •                                                                      | •                                                                      | •                                                                                         |
| BBS10   | Disrupted                          | Disrupted                          | Disrupted                | Disrupted                 | •                                                                     | •                                                                      | •                                                                      | •                                                                                         |
| BUBR1   | Normal                             | Normal                             | Normal                   | Normal                    | ↓ (0.07 ± 0.07)                                                       | ↓ (0.19 ± 0.09)                                                        | ↓ (0.35 ± 0.03)                                                        | ↓ (0.21 ± 0.12)                                                                           |
| IFT80   | Normal                             | Normal                             | Normal                   | Normal                    | ↓ (0.15 ± 0.07)                                                       | ↓ (0.72 ± 0.03)                                                        | ↓ (0.72 ± 0.03)                                                        | ↓ (0.71 ± 0.18)                                                                           |
| KIF7    | Disrupted                          | Normal                             | Normal                   | Normal                    | ↓ (0.26 ± 0.05)                                                       | ↓ 0.73 ± 0.11)                                                         | ↓ (0.38 ± 0.08)                                                        | ↓ (0.41 ± 0.16)                                                                           |
| TMEM216 | Disrupted                          | Normal                             | Disrupted                | Normal                    | ↓ (0.20 ± 0.05)                                                       | ↓ (0.50 ± 0.03)                                                        | ↓ (0.71 ± 0.05%)                                                       | ↓ (0.23 ± 0.11)                                                                           |

No significant changes were observed in AHI1, ALMS1, B9D1, BBS2, BBS3, BBS4, BBS5, BBS6, BBS8, BBS9, BBS11, BBS12, CEP41, CEP290, CC2D2A, FTO, MKS1, MKS3, NPHP1, NPHP8, TCTN2, OFD1, and TUB shRNA groups. Data shown are mean ( $\pm$  SEM) fold basal changes. Abbreviations used: •, no significant changes; ↓, decreased, p value < 0.05 (Student's t test). Number of embryos/group = 4. Total number of cells analyzed: PH3<sup>+</sup>/GFP<sup>+</sup> [Control (523), BUBR1 (678), TME216 (586), IFT80 (632), KIF7 (602)], Tbr2<sup>+</sup>/BrdU<sup>+</sup>/GFP<sup>+</sup> [Control (629), BUBR1 (536), TMEM216 (637), IFT80 (579), KIF7 (646)]. Also see Figures 2 and 3. Qualitative changes in radial glial morphology were analyzed in 15 serial sections obtained from 4 different embryonic brains.

**Table S7. Ciliopathy genes and neuronal migration**

| Gene    | Changes in # of branches of multipolar migrating neurons (fold basal) | Changes in length of processes of multipolar migrating neurons (fold basal) | Changes in # of branches of bipolar migrating neurons (fold basal) | Changes in length of leading process of bipolar migrating neurons (fold basal) | Changes in leading process orientation <sup>^</sup> of bipolar neurons (fold basal) | Altered extent of migration <sup>*</sup> |
|---------|-----------------------------------------------------------------------|-----------------------------------------------------------------------------|--------------------------------------------------------------------|--------------------------------------------------------------------------------|-------------------------------------------------------------------------------------|------------------------------------------|
| AHI1    | •                                                                     | •                                                                           | •                                                                  | •                                                                              | •                                                                                   | ↓                                        |
| ALMS1   | ↓ (0.4 ± 0.02)                                                        | ↓ (0.17 ± 0.04)                                                             | •                                                                  | •                                                                              | •                                                                                   | ↓                                        |
| BBS1    | •                                                                     | •                                                                           | ↑ (2.1 ± 0.24)                                                     | •                                                                              | Yes (6.7 ± 1.2)                                                                     | ↓                                        |
| BBS4    | •                                                                     | •                                                                           | ↑ (1.8 ± 0.7)                                                      | ↓ (0.45 ± 0.13)                                                                | •                                                                                   | ↓                                        |
| BBS7    | ↑ (2.14 ± 0.03)                                                       | ↓ (0.28 ± 0.07)                                                             | •                                                                  | •                                                                              | •                                                                                   | ↓                                        |
| BBS9    | •                                                                     | •                                                                           | •                                                                  | •                                                                              | •                                                                                   | ↓                                        |
| BBS10   | •                                                                     | ↑ (2.4 ± 0.37)                                                              | ↑ (1.7 ± 0.3)                                                      | •                                                                              | •                                                                                   | ↓                                        |
| BBS11   | •                                                                     | •                                                                           | •                                                                  | •                                                                              | •                                                                                   | ↓                                        |
| BBS12   | •                                                                     | •                                                                           | •                                                                  | ↓ (0.42 ± 0.19)                                                                | •                                                                                   | ↓                                        |
| BUBR1   | •                                                                     | •                                                                           | ↑ (1.8 ± 0.2)                                                      | ↓ (0.67 ± 0.33)                                                                | •                                                                                   | ↓                                        |
| IFT80   | •                                                                     | •                                                                           | ↑ (1.6 ± 0.3)                                                      | ↓ (0.29 ± 0.15)                                                                | •                                                                                   | ↓                                        |
| KIF7    | ↓ (0.37 ± 0.08)                                                       | ↓ (0.11 ± 0.06)                                                             | •                                                                  | ↓ (0.17 ± 0.11)                                                                | •                                                                                   | ↓                                        |
| NPHP1   | •                                                                     | •                                                                           | •                                                                  | ↓ (0.58 ± 0.24)                                                                | •                                                                                   | ↓                                        |
| NPHP8   | •                                                                     | •                                                                           | ↑ (2.2 ± 0.7)                                                      | ↓ (0.51 ± 0.21)                                                                | Yes (7.3 ± 2.1)                                                                     | ↓                                        |
| TCTN2   | •                                                                     | •                                                                           | •                                                                  | •                                                                              | Yes (5.4 ± 1.7)                                                                     | ↓                                        |
| TMEM216 | •                                                                     | •                                                                           | •                                                                  | •                                                                              | •                                                                                   | ↓                                        |
| TUB     | •                                                                     | •                                                                           | ↑ (3.1 ± 0.8)                                                      | ↓ (0.57 ± 0.13)                                                                | •                                                                                   | ↓                                        |

Data shown are mean (± SEM) fold basal changes. No significant changes were observed in BBS2, BBS3, BBS5, BBS6, BBS8, MKS1, MKS3, CEP290, CC2D2A, B9D1, OFD1, FTO, and CEP41 shRNA groups. Abbreviations used: •, no significant changes; ↑, increased; ↓, decreased, p value < 0.05 (Student's t test). Changes in the extent of migration were tested with two-way ANOVA. Number of embryos / group = 4. Number of cells analyzed: number and length of multipolar neuronal branches [Control (31), BBS7 (32), KIF7 (36), ALMS1 (25), BBS10 (33)], number and length of bipolar neurites [Control (60), BBS1 (76), BBS4 (62), BBS10 (72), BUBR1 (64), IFT80 (63), NPHP8 (61), TUB (60)], leading process orientation [Control (51), NPHP8 (51), TCTN2 (36)], extent of migration [Control (749), AHI1 (523), ALMS1 (437), BBS1 (605), BBS4 (645), BBS7 (703), BBS9 (499), BBS10 (721), BBS11 (742), BBS12 (743), BUBR1 (641), IFT80 (634), KIF7 (690), NPHP1 (633), NPHP8 (589), TCTN2 (625), TMEM216 (712), TUB (596)]. <sup>\*</sup>See Figures 4 (G, H-L) and S1 for quantification of migration. <sup>^</sup>, % of neurons with mis-oriented leading processes (angle of leading process relative to the pial surface < 75°).

**Table S8. Ciliopathy genes, neuronal identity and placement**

| Gene    | Changes in % of GFP <sup>+</sup> /Tbr1 <sup>+</sup> neurons | Changes in % of GFP <sup>+</sup> /Ctip2 <sup>+</sup> neurons | Changes in % of GFP <sup>+</sup> /Cux1 <sup>+</sup> neurons | Changes in the laminar distribution of GFP <sup>+</sup> /Tbr1 <sup>+</sup> neurons | Changes in the laminar distribution of GFP <sup>+</sup> /Ctip2 <sup>+</sup> neurons | Changes in the laminar distribution of GFP <sup>+</sup> /Cux1 <sup>+</sup> neurons |
|---------|-------------------------------------------------------------|--------------------------------------------------------------|-------------------------------------------------------------|------------------------------------------------------------------------------------|-------------------------------------------------------------------------------------|------------------------------------------------------------------------------------|
| AHI1    | •                                                           | •                                                            | •                                                           | •                                                                                  | •                                                                                   | Yes (62 ± 2.9%)                                                                    |
| ALMS1   | •                                                           | •                                                            | •                                                           | •                                                                                  | •                                                                                   | Yes (79 ± 9.4%)                                                                    |
| BBS1    | •                                                           | •                                                            | •                                                           | •                                                                                  | •                                                                                   | Yes (29 ± 2.1%)                                                                    |
| BBS4    | •                                                           | •                                                            | •                                                           | •                                                                                  | •                                                                                   | Yes (34 ± 2.7%)                                                                    |
| BBS9    | •                                                           | •                                                            | •                                                           | •                                                                                  | •                                                                                   | Yes (24 ± 3.1%)                                                                    |
| BBS10   | •                                                           | •                                                            | •                                                           | •                                                                                  | •                                                                                   | Yes (39 ± 4.6%)                                                                    |
| BBS11   | •                                                           | •                                                            | •                                                           | •                                                                                  | •                                                                                   | Yes (15 ± 7.3%)                                                                    |
| BBS12   | •                                                           | •                                                            | •                                                           | •                                                                                  | •                                                                                   | Yes (21 ± 2.9%)                                                                    |
| BUBR1   | •                                                           | •                                                            | •                                                           | •                                                                                  | •                                                                                   | Yes (9.3 ± 3.6%)                                                                   |
| IFT80   | •                                                           | •                                                            | •                                                           | •                                                                                  | •                                                                                   | Yes (25 ± 5.2%)                                                                    |
| KIF7    | •                                                           | •                                                            | •                                                           | •                                                                                  | •                                                                                   | Yes (19 ± 3.2%)                                                                    |
| NPHP1   | •                                                           | •                                                            | •                                                           | •                                                                                  | •                                                                                   | Yes (59 ± 5.5%)                                                                    |
| NPHP8   | •                                                           | •                                                            | •                                                           | •                                                                                  | •                                                                                   | Yes (11 ± 2.3%)                                                                    |
| TCTN2   | •                                                           | •                                                            | •                                                           | •                                                                                  | •                                                                                   | Yes (6.3 ± 1.1%)                                                                   |
| TMEM216 | •                                                           | •                                                            | •                                                           | •                                                                                  | •                                                                                   | Yes (31 ± 2.9%)                                                                    |
| TUB     | •                                                           | •                                                            | •                                                           | •                                                                                  | •                                                                                   | Yes (17 ± 2.6 %)                                                                   |

No significant changes were observed in BBS2, BBS3, BBS5, BBS6, BBS7, BBS8, MKS1, MKS3, CEP290, CC2D2A, B9D1, OFD1, FTO, and CEP41 shRNA groups. Data shown are mean (± SEM). % of neurons in ectopic locations are indicated. Abbreviations used: •, no significant changes, p value ≥ 0.05, (Student's t test). Number of embryos/ group = 4. Number of total cells analyzed: GFP<sup>+</sup>/Tbr1<sup>+</sup> [Control (602), AHI1 (453), ALMS1 (564), BBS1 (674), BBS4 (756), BBS7 (732), BBS9 (544), BBS10 (642), BBS11 (634), BBS12 (633), NPHP1 (547), NPHP8 (651), TCTN2 (622), TMEM216 (598), TUB (587)], GFP<sup>+</sup>/Ctip2<sup>+</sup>/Cux1<sup>+</sup> [Control (606), AHI1 (467), ALMS1 (521), BBS1 (698), BBS4 (634), BBS7 (634), BBS9 (498), BBS10 (669), BBS11 (603), BBS12 (623), NPHP1 (587), NPHP8 (641), TCTN2 (702), TMEM216 (622), TUB (569)]. Also see Figure S2 for quantification.



**Table S9. Ciliopathy genes and post-migratory neuronal differentiation**

| Gene    | Changes in axonal outgrowth (fold basal) | Changes in midline crossing | Changes in axonal fasciculation | Changes in apical neurite morphology | Changes in apical neurite total length ( $\mu\text{m}$ ) (fold basal) | Changes in # of apical neurite processes (fold basal) | Changes in # of basal neurite processes | Changes in filopodial density (fold basal) |
|---------|------------------------------------------|-----------------------------|---------------------------------|--------------------------------------|-----------------------------------------------------------------------|-------------------------------------------------------|-----------------------------------------|--------------------------------------------|
| BBS1    | •                                        | Yes                         | No                              | No                                   | •                                                                     | •                                                     | •                                       | •                                          |
| BBS5    | ↓ (0.64 ± 0.08)                          | Yes                         | Yes                             | No                                   | •                                                                     | •                                                     | •                                       | •                                          |
| BBS7    | ↓ (0.75 ± 0.02)                          | Yes                         | Yes                             | No                                   | •                                                                     | •                                                     | •                                       | •                                          |
| BBS9    | •                                        | No                          | Yes                             | Yes                                  | ↓ (0.33 ± 0.08)                                                       | ↓ (0.467 ± 0.03)                                      | •                                       | ↓ (0.39 ± 0.06)                            |
| BBS10   | •                                        | No                          | No                              | Yes                                  | ↓ (0.40 ± 0.02)                                                       | ↓ (0.72 ± 0.02)                                       | •                                       | •                                          |
| BBS11   | •                                        | Yes                         | Yes                             | Yes                                  | ↓ (0.65 ± 0.05)                                                       | ↓ (0.68 ± 0.02)                                       | •                                       | ↓ (0.51 ± 0.12)                            |
| BBS12   | •                                        | Yes                         | Yes                             | Yes                                  | ↓ (0.74 ± 0.03)                                                       | ↓ (0.66 ± 0.03)                                       | •                                       | ↓ (0.28 ± 0.10)                            |
| KIF7    | •                                        | Yes                         | No                              | Yes                                  | ↓ (0.61 ± 0.09)                                                       | ↓ (0.60 ± 0.03)                                       | •                                       | •                                          |
| NPHP1   | •                                        | No                          | No                              | Yes                                  | ↓ (0.59 ± 0.06)                                                       | ↓ (0.62 ± 0.03)                                       | •                                       | ↓ (0.54 ± 0.09)                            |
| TMEM216 | •                                        | No                          | Yes                             | No                                   | •                                                                     | •                                                     | •                                       | •                                          |

No significant changes were observed in ALMS1, AHI1, B9D1, BBS2, BBS3, BBS4, BBS6, BBS8, BUBR1, CC2D2A, CEP41, CEP290, FTO, IFT80, MKS1, MKS3, NPHP8, OFD1, TCTN2, and TUB shRNA groups. Data shown are mean ( $\pm$  SEM) fold basal changes. Abbreviation used: •, no significant changes; ↓, p value < 0.05 (Student's t test). Number of embryos/group = 4. Number of total cells analyzed: axonal outgrowth [Control (156), BBS5 (189), BBS7 (246)], number and length of neurites and filopodial density [Control (16), BBS9 (17), BBS10 (15), BBS11 (14), BBS12 (12), KIF7 (12), NPHP1 (19)]. Also see Figure 5 for quantification. Qualitative changes in midline crossing, axonal fasciculation were analyzed in serial sections obtained from 4 embryonic brains.

**Table S10. Ciliopathy gene mutations associated with multiple aspects of human brain development**

| Gene     | Neural tube patterning defects | Embryonic neurogenesis defects |                       | Neuronal migration defects                     | Axonal projection defects (decussation) |                      |                     | Adult neurogenesis     |
|----------|--------------------------------|--------------------------------|-----------------------|------------------------------------------------|-----------------------------------------|----------------------|---------------------|------------------------|
|          | Encephalocele or exencephaly   | Microcephaly                   | Cerebellar hypoplasia | Polymicrogyria or Heterotopia or lissencephaly | CST                                     | SCP                  | Corpus callosum     | Hippocampal dysgenesis |
| AHI1     |                                |                                | Yes <sup>4,93</sup>   | Yes <sup>94,95</sup>                           | Yes <sup>4,93</sup>                     | Yes <sup>4,93</sup>  | Yes <sup>4,93</sup> |                        |
| ALMS1*   |                                | Yes <sup>25</sup>              |                       |                                                |                                         |                      | Yes <sup>25</sup>   |                        |
| ARL13B   | Yes <sup>82</sup>              |                                | Yes <sup>82</sup>     | Yes <sup>96</sup>                              |                                         | Yes <sup>82</sup>    |                     |                        |
| BBS4*    |                                |                                | Yes <sup>83</sup>     |                                                | Yes <sup>83</sup>                       |                      |                     |                        |
| BUBR1*   |                                | Yes <sup>26</sup>              | Yes <sup>26</sup>     |                                                |                                         |                      | Yes <sup>26</sup>   |                        |
| C5orf42  |                                |                                |                       |                                                |                                         | Yes <sup>50</sup>    | Yes <sup>50</sup>   |                        |
| CC2D2A*  |                                |                                | Yes <sup>22</sup>     |                                                |                                         | Yes <sup>22</sup>    | Yes <sup>22</sup>   |                        |
| CENPF*   |                                | Yes <sup>62</sup>              | Yes <sup>62</sup>     |                                                |                                         |                      | Yes <sup>62</sup>   |                        |
| CEP41    |                                |                                | Yes <sup>5</sup>      |                                                |                                         | Yes <sup>5</sup>     |                     |                        |
| CEP120   |                                |                                | Yes <sup>56</sup>     |                                                |                                         | Yes <sup>56</sup>    | Yes <sup>56</sup>   |                        |
| CEP290   |                                |                                | Yes <sup>21</sup>     |                                                |                                         | Yes <sup>21</sup>    |                     |                        |
| CSPP1    | Yes <sup>41</sup>              |                                | Yes <sup>41</sup>     | Yes <sup>41</sup>                              |                                         | Yes <sup>41</sup>    |                     |                        |
| INPP5E   |                                |                                | Yes <sup>43</sup>     |                                                |                                         | Yes <sup>43</sup>    |                     |                        |
| KATNB1*  |                                | Yes <sup>63</sup>              |                       |                                                |                                         |                      | Yes <sup>63</sup>   |                        |
| KIF7*    |                                |                                | Yes <sup>31</sup>     |                                                |                                         | Yes <sup>31</sup>    | Yes <sup>31</sup>   | Yes <sup>31</sup>      |
| MKS3*    | Yes <sup>85</sup>              |                                | Yes <sup>85</sup>     |                                                |                                         | Yes <sup>85</sup>    |                     |                        |
| NPHP1    |                                |                                | Yes <sup>86,87</sup>  |                                                |                                         | Yes <sup>86,87</sup> |                     |                        |
| NPHP8    | Yes <sup>88,92</sup>           |                                | Yes <sup>88,92</sup>  |                                                |                                         | Yes <sup>88,92</sup> |                     |                        |
| OFD1*    |                                |                                | Yes <sup>35</sup>     | Yes <sup>35</sup>                              |                                         | Yes <sup>35</sup>    | Yes <sup>35</sup>   | Yes <sup>35</sup>      |
| RTTN*    |                                |                                |                       | Yes <sup>81</sup>                              |                                         |                      | Yes <sup>81</sup>   |                        |
| SCLT1    |                                | Yes <sup>51</sup>              | Yes <sup>51</sup>     | Yes <sup>51</sup>                              |                                         | Yes <sup>51</sup>    | Yes <sup>51</sup>   |                        |
| TBC1D32  |                                | Yes <sup>51</sup>              | Yes <sup>51</sup>     | Yes <sup>51</sup>                              |                                         | Yes <sup>51</sup>    | Yes <sup>51</sup>   |                        |
| TCTN2    |                                |                                | Yes <sup>45</sup>     |                                                |                                         | Yes <sup>45</sup>    |                     |                        |
| TMEM237* | Yes <sup>89,90</sup>           |                                | Yes <sup>89,90</sup>  |                                                |                                         | Yes <sup>89,90</sup> |                     |                        |

Abbreviations used: CST, corticospinal tract; SCP, superior cerebellum peduncle; AHI1, Abelson helper integration site 1; ALMS1, Alstrom syndrome 1; ARL13B, ADP-ribosylation factor-like protein 13B; BBS4, Bardet-Biedl syndrome 4; BUBR1, Bub1-related kinase; C5orf42, chromosome 5 open reading frame 42; CC2D2A, coiled-coil and C2 domain containing 2A; CENPF, centromere protein F; CEP 41, centrosomal protein 41; CEP120, centrosomal protein 120; CEP 290, centrosomal protein 290; CSPP1, centrosome and spindle pole associated protein 1; INPP5E, Inositol polyphosphate-5-phosphatase; KATNB1, Katanin p80 subunit B1; KIF7, Kinesin family member 7; MKS3, Meckle Syndrome 3; NPHP, Nephronophthisis; OFD1, Oral-facial-digital syndrome 1; RTTN, rotatin; SCLT1, sodium channel and clathrin linker 1; TBC1D32, TBC1 domain family, member 32; TCTN2, tectonic family member 2; TMEM237, transmembrane protein 237. \*, These gene mutations also cause hydrocephalus.

## Supplemental References

- 1 Cheng, Y.-Z. *et al.* Investigating embryonic expression patterns and evolution of AHI1 and CEP290 genes, implicated in Joubert syndrome. *PloS one* **7**, e44975, doi:10.1371/journal.pone.0044975 (2012).
- 2 Lancaster, M. A. *et al.* Defective Wnt-dependent cerebellar midline fusion in a mouse model of Joubert syndrome. *Nature Medicine* **17**, 726-731, doi:10.1038/nm.2380 (2011).
- 3 Brancati, F., Dallapiccola, B. & Valente, E. M. Joubert Syndrome and related disorders. *Orphanet Journal of Rare Diseases* **5**, 20, doi:10.1186/1750-1172-5-20 (2010).
- 4 Dixon-Salazar, T. *et al.* Mutations in the AHI1 gene, encoding jouberin, cause Joubert syndrome with cortical polymicrogyria. *American journal of human genetics* **75**, 979-987, doi:10.1086/425985 (2004).
- 5 Lee, J. E. *et al.* CEP41 is mutated in Joubert syndrome and is required for tubulin glutamylation at the cilium. *Nature genetics* **44**, 193-199, doi:10.1038/ng.1078 (2012).
- 6 Nachury, M. V. *et al.* A core complex of BBS proteins cooperates with the GTPase Rab8 to promote ciliary membrane biogenesis. *Cell* **129**, 1201-1213, doi:10.1016/j.cell.2007.03.053 (2007).
- 7 Zhang, Q., Yu, D., Seo, S., Stone, E. M. & Sheffield, V. C. Intrinsic protein-protein interaction-mediated and chaperonin-assisted sequential assembly of stable bardet-biedl syndrome protein complex, the BBSome. *The Journal of Biological Chemistry* **287**, 20625-20635, doi:10.1074/jbc.M112.341487 (2012).
- 8 Soetedjo, L., Glover, D. v. A. & Jin, H. Targeting of vasoactive intestinal peptide receptor 2, VPAC2, a secretin family G-protein coupled receptor, to primary cilia. *Biology open* **2**, 686-694, doi:10.1242/bio.20134747 (2013).
- 9 Loktev, A. V. & Jackson, P. K. Neuropeptide Y Family Receptors Traffic via the Bardet-Biedl Syndrome Pathway to Signal in Neuronal Primary Cilia. *Cell Reports* **5**, 1316-1329, doi:10.1016/j.celrep.2013.11.011 (2013).
- 10 Rooryck, C. *et al.* Bardet-biedl syndrome and brain abnormalities. *NEUROPEDIATRICS* **38**, 5-9, doi:10.1055/s-2007-981466 (2007).
- 11 Zhang, Q. *et al.* Bardet-Biedl syndrome 3 (Bbs3) knockout mouse model reveals common BBS-associated phenotypes and Bbs3 unique phenotypes. *Proceedings of the National Academy of Sciences of the United States of America* **108**, 20678-20683, doi:10.1073/pnas.1113220108 (2011).
- 12 Seo, S. *et al.* BBS6, BBS10, and BBS12 form a complex with CCT/TRiC family chaperonins and mediate BBSome assembly. *Proceedings of the National Academy of Sciences of the United States of America* **107**, 1488-1493, doi:10.1073/pnas.0910268107 (2010).
- 13 Locke, M., Tinsley, C. L., Benson, M. A. & Blake, D. J. TRIM32 is an E3 ubiquitin ligase for dysbindin. *Human Molecular Genetics* **18**, 2344-2358, doi:10.1093/hmg/ddp167 (2009).
- 14 Garcia-Gonzalo, F. R. *et al.* A transition zone complex regulates mammalian ciliogenesis and ciliary membrane composition. *Nature genetics* **43**, 776-784, doi:10.1038/ng.891 (2011).

- 15 Williams, C. L. *et al.* MKS and NPHP modules cooperate to establish basal body/transition zone membrane associations and ciliary gate function during ciliogenesis. *The Journal of Cell Biology* **192**, 1023-1041, doi:10.1083/jcb.201012116 (2011).
- 16 Szymanska, K. & Johnson, C. A. The transition zone: an essential functional compartment of cilia. *Cilia* **1**, 10, doi:10.1186/2046-2530-1-10 (2012).
- 17 Valente, E. M. *et al.* Mutations in TMEM216 perturb ciliogenesis and cause Joubert, Meckel and related syndromes. *Nature genetics* **42**, 619-625, doi:10.1038/ng.594 (2010).
- 18 Leightner, A. C. *et al.* The Meckel syndrome protein meckelin (TMEM67) is a key regulator of cilia function but is not required for tissue planar polarity. *Human molecular genetics* **22**, 2024-2040, doi:10.1093/hmg/ddt054 (2013).
- 19 Abdelhamed, Z. A. *et al.* Variable expressivity of ciliopathy neurological phenotypes that encompass Meckel-Gruber syndrome and Joubert syndrome is caused by complex de-regulated ciliogenesis, Shh and Wnt signalling defects. *Human molecular genetics* **22**, 1358-1372, doi:10.1093/hmg/dds546 (2013).
- 20 Parisi, M. A. Clinical and molecular features of Joubert syndrome and related disorders. *American journal of medical genetics Part C, Seminars in medical genetics* **151C**, 326-340, doi:10.1002/ajmg.c.30229 (2009).
- 21 Valente, E. M. *et al.* Mutations in CEP290, which encodes a centrosomal protein, cause pleiotropic forms of Joubert syndrome. *Nature Genetics* **38**, 623-625, doi:10.1038/ng1805 (2006).
- 22 Gorden, N. T. *et al.* CC2D2A is mutated in Joubert syndrome and interacts with the ciliopathy-associated basal body protein CEP290. *American journal of human genetics* **83**, 559-571, doi:10.1016/j.ajhg.2008.10.002 (2008).
- 23 Jagger, D. *et al.* Alström Syndrome protein ALMS1 localizes to basal bodies of cochlear hair cells and regulates cilium-dependent planar cell polarity. *Human Molecular Genetics* **20**, 466-481, doi:10.1093/hmg/ddq493 (2011).
- 24 Heydet, D. *et al.* A truncating mutation of Alms1 reduces the number of hypothalamic neuronal cilia in obese mice. *Developmental Neurobiology* **73**, 1-13, doi:10.1002/dneu.22031 (2013).
- 25 Citton, V. *et al.* Brain involvement in Alström syndrome. *Orphanet Journal of Rare Diseases* **8**, 24-24, doi:info:pmid/23406482 (2013).
- 26 Miyamoto, T. *et al.* Insufficiency of BUBR1, a mitotic spindle checkpoint regulator, causes impaired ciliogenesis in vertebrates. *Human Molecular Genetics* **20**, 2058-2070, doi:10.1093/hmg/ddr090 (2011).
- 27 Suijkerbuijk, S. J. E. *et al.* Molecular causes for BUBR1 dysfunction in the human cancer predisposition syndrome mosaic variegated aneuploidy. *Cancer Research* **70**, 4891-4900, doi:10.1158/0008-5472.CAN-09-4319 (2010).
- 28 Kajii, T. *et al.* Cancer-prone syndrome of mosaic variegated aneuploidy and total premature chromatid separation: report of five infants. *American journal of medical genetics* **104**, 57-64 (2001).
- 29 Rix, S., Calmont, A., Scambler, P. J. & Beales, P. L. An lft80 mouse model of short rib polydactyly syndromes shows defects in hedgehog signalling without loss or malformation of cilia. *Human molecular genetics* **20**, 1306-1314, doi:10.1093/hmg/ddr013 (2011).

- 30 Lehman, A. M. *et al.* Co-Occurrence of Joubert Syndrome and Jeune Asphyxiating Thoracic Dystrophy. *American journal of medical genetics. Part A* **0**, 1411, doi:10.1002/ajmg.a.33416.
- 31 Putoux, A. *et al.* KIF7 mutations cause fetal hydrolethalus and acrocallosal syndromes. *Nature Genetics* **43**, 601-606, doi:10.1038/ng.826 (2011).
- 32 Liem, K. F., He, M., Ocbina, P. J. R. & Anderson, K. V. Mouse Kif7/Costal2 is a cilia-associated protein that regulates Sonic hedgehog signaling. *Proceedings of the National Academy of Sciences of the United States of America* **106**, 13377-13382, doi:10.1073/pnas.0906944106 (2009).
- 33 Singla, V., Romaguera-Ros, M., Garcia-Verdugo, J. M. & Reiter, J. F. Ofd1, a human disease gene, regulates the length and distal structure of centrioles. *Developmental cell* **18**, 410-424, doi:10.1016/j.devcel.2009.12.022 (2010).
- 34 Macca, M. & Franco, B. The molecular basis of oral-facial-digital syndrome, type 1. *American journal of medical genetics Part C, Seminars in medical genetics* **151C**, 318-325, doi:10.1002/ajmg.c.30224 (2009).
- 35 Bisschoff, I. J. *et al.* Novel mutations including deletions of the entire OFD1 gene in 30 families with type 1 orofaciodigital syndrome: a study of the extensive clinical variability. *Human mutation* **34**, 237-247, doi:10.1002/humu.22224 (2013).
- 36 Mukhopadhyay, S. & Jackson, P. K. The tubby family proteins. *Genome Biology* **12**, 225, doi:10.1186/gb-2011-12-6-225 (2011).
- 37 Sun, X. *et al.* Tubby is required for trafficking G protein-coupled receptors to neuronal cilia. *Cilia* **1**, 21, doi:10.1186/2046-2530-1-21 (2012).
- 38 Ho, A. J. *et al.* A commonly carried allele of the obesity-related FTO gene is associated with reduced brain volume in the healthy elderly. *Proceedings of the National Academy of Sciences of the United States of America* **107**, 8404-8409, doi:10.1073/pnas.0910878107 (2010).
- 39 Osborn, D. P. S. *et al.* Loss of FTO antagonises Wnt signaling and leads to developmental defects associated with ciliopathies. *PloS one* **9**, e87662, doi:10.1371/journal.pone.0087662 (2014).
- 40 Larkins, C. E., Aviles, G. D. G., East, M. P., Kahn, R. A. & Caspary, T. Arl13b regulates ciliogenesis and the dynamic localization of Shh signaling proteins. *Molecular Biology of the Cell* **22**, 4694-4703, doi:10.1091/mbc.E10-12-0994 (2011).
- 41 Tuz, K. *et al.* Mutations in CSPP1 cause primary cilia abnormalities and Joubert syndrome with or without Jeune asphyxiating thoracic dystrophy. *American journal of human genetics* **94**, 62-72, doi:10.1016/j.ajhg.2013.11.019 (2014).
- 42 Lee, J. H. *et al.* Evolutionarily assembled cis-regulatory module at a human ciliopathy locus. *Science* **335**, 966-969, doi:10.1126/science.1213506 (2012).
- 43 Jacoby, M. *et al.* INPP5E mutations cause primary cilium signaling defects, ciliary instability and ciliopathies in human and mouse. *Nature genetics* **41**, 1027-1031, doi:10.1038/ng.427 (2009).
- 44 Apostolou, T. *et al.* Late onset of renal disease in nephronophthisis with features of Joubert syndrome type B. *Nephrology, dialysis, transplantation : official publication of the European Dialysis and Transplant Association - European Renal Association* **16**, 2412-2415 (2001).

- 45 Sang, L. *et al.* Mapping the NPHP-JBTS-MKS protein network reveals ciliopathy disease genes and pathways. *Cell* **145**, 513-528, doi:10.1016/j.cell.2011.04.019 (2011).
- 46 Barbelanne, M., Song, J., Ahmadzai, M. & Tsang, W. Y. Pathogenic NPHP5 mutations impair protein interaction with Cep290, a prerequisite for ciliogenesis. *Human Molecular Genetics* **22**, 2482-2494, doi:10.1093/hmg/ddt100 (2013).
- 47 Ramachandran, H. *et al.* Interaction with the Bardet-Biedl Gene Product TRIM32/BBS11 Modifies the Half-life and Localization of Glis2/NPHP7. *Journal of Biological Chemistry* **289**, 8390-8401, doi:10.1074/jbc.M113.534024 (2014).
- 48 Fukui, H., Shiba, D., Asakawa, K., Kawakami, K. & Yokoyama, T. The ciliary protein Nek8/Nphp9 acts downstream of Inv/Nphp2 during pronephros morphogenesis and left-right establishment in zebrafish. *FEBS letters* **586**, 2273-2279, doi:10.1016/j.febslet.2012.05.064 (2012).
- 49 Failler, M. *et al.* Mutations of CEP83 cause infantile nephronophthisis and intellectual disability. *American journal of human genetics* **94**, 905-914, doi:10.1016/j.ajhg.2014.05.002 (2014).
- 50 Bayram, Y. *et al.* Exome sequencing identifies a homozygous C5orf42 variant in a Turkish kindred with oral-facial-digital syndrome type VI. *American Journal of Medical Genetics Part A*, doi:10.1002/ajmg.a.37092 (2015).
- 51 Adly, N., Alhashem, A., Ammari, A. & Alkuraya, F. S. Ciliary genes TBC1D32/C6orf170 and SCLT1 are mutated in patients with OFD type IX. *Human Mutation* **35**, 36-40, doi:10.1002/humu.22477 (2014).
- 52 Nauli, S. M. *et al.* Polycystins 1 and 2 mediate mechanosensation in the primary cilium of kidney cells. *Nature Genetics* **33**, 129-137, doi:10.1038/ng1076 (2003).
- 53 Yoder, B. K. Role of primary cilia in the pathogenesis of polycystic kidney disease. *Journal of the American Society of Nephrology : JASN* **18**, 1381-1388, doi:10.1681/ASN.2006111215 (2007).
- 54 Ibañez-Tallon, I., Gorokhova, S. & Heintz, N. Loss of function of axonemal dynein Mdnah5 causes primary ciliary dyskinesia and hydrocephalus. *Human Molecular Genetics* **11**, 715-721 (2002).
- 55 Ostrowski, L. E. *et al.* Conditional deletion of dnaic1 in a murine model of primary ciliary dyskinesia causes chronic rhinosinusitis. *American Journal of Respiratory Cell and Molecular Biology* **43**, 55-63, doi:10.1165/rcmb.2009-0118OC (2010).
- 56 Shaheen, R. *et al.* A founder CEP120 mutation in Jeune asphyxiating thoracic dystrophy expands the role of centriolar proteins in skeletal ciliopathies. *Human molecular genetics* **24**, 1410-1419, doi:10.1093/hmg/ddu555 (2015).
- 57 al-Gazali, L. I. *et al.* Complex consanguinity associated with short rib-polydactyly syndrome III and congenital infection-like syndrome: a diagnostic problem in dysmorphic syndromes. *Journal of Medical Genetics* **36**, 461-466 (1999).
- 58 El Hokayem, J. *et al.* NEK1 and DYNC2H1 are both involved in short rib polydactyly Majewski type but not in Beemer Langer cases. *Journal of Medical Genetics* **49**, 227-233, doi:10.1136/jmedgenet-2011-100717 (2012).
- 59 Shalom, O., Shalva, N., Altschuler, Y. & Motro, B. The mammalian Nek1 kinase is involved in primary cilium formation. *FEBS letters* **582**, 1465-1470, doi:10.1016/j.febslet.2008.03.036 (2008).

- 60 Dagoneau, N. *et al.* DYNC2H1 mutations cause asphyxiating thoracic dystrophy and short rib-polydactyly syndrome, type III. *American journal of human genetics* **84**, 706-711, doi:10.1016/j.ajhg.2009.04.016 (2009).
- 61 Davis, E. E. *et al.* TTC21B contributes both causal and modifying alleles across the ciliopathy spectrum. *Nature Genetics* **43**, 189-196, doi:10.1038/ng.756 (2011).
- 62 Waters, A. M. *et al.* The kinetochore protein, CENPF, is mutated in human ciliopathy and microcephaly phenotypes. *Journal of Medical Genetics* **52**, 147-156, doi:10.1136/jmedgenet-2014-102691 (2015).
- 63 Hu, W. F. *et al.* Katanin p80 regulates human cortical development by limiting centriole and cilia number. *Neuron* **84**, 1240-1257, doi:10.1016/j.neuron.2014.12.017 (2014).
- 64 McIntyre, J. C. *et al.* Gene therapy rescues cilia defects and restores olfactory function in a mammalian ciliopathy model. *Nature Medicine* **18**, 1423-1428, doi:10.1038/nm.2860 (2012).
- 65 den Hollander, A. I., Roepman, R., Koenekoop, R. K. & Cremers, F. P. M. Leber congenital amaurosis: genes, proteins and disease mechanisms. *Progress in retinal and eye research* **27**, 391-419, doi:10.1016/j.preteyeres.2008.05.003 (2008).
- 66 Mackay, D. S. *et al.* Screening of a large cohort of leber congenital amaurosis and retinitis pigmentosa patients identifies novel LCA5 mutations and new genotype-phenotype correlations. *Human mutation* **34**, 1537-1546, doi:10.1002/humu.22398 (2013).
- 67 Kanan, Y., Wicker, L. D., Al-Ubaidi, M. R., Mandal, N. A. & Kasus-Jacobi, A. Retinol dehydrogenases RDH11 and RDH12 in the mouse retina: expression levels during development and regulation by oxidative stress. *Investigative Ophthalmology & Visual Science* **49**, 1071-1078, doi:10.1167/iovs.07-1207 (2008).
- 68 Kennan, A. *et al.* Identification of an IMPDH1 mutation in autosomal dominant retinitis pigmentosa (RP10) revealed following comparative microarray analysis of transcripts derived from retinas of wild-type and Rho(-/-) mice. *Human Molecular Genetics* **11**, 547-557 (2002).
- 69 Yang, H. K., Hwang, J.-M., Park, S. S. & Yu, Y. S. Brain imaging studies in Leber's congenital amaurosis: new radiologic findings associated with the complex trait. *Korean Journal of Ophthalmology* **24**, 360-363, doi:10.3341/kjo.2010.24.6.360 (2010).
- 70 Freund, C. L. *et al.* De novo mutations in the CRX homeobox gene associated with Leber congenital amaurosis. *Nature genetics* **18**, 311-312, doi:10.1038/ng0498-311 (1998).
- 71 Roosing, S. *et al.* Maternal uniparental isodisomy of chromosome 6 reveals a TULP1 mutation as a novel cause of cone dysfunction. *Ophthalmology* **120**, 1239-1246, doi:10.1016/j.ophtha.2012.12.005 (2013).
- 72 Sergouniotis, P. I. *et al.* Recessive mutations in KCNJ13, encoding an inwardly rectifying potassium channel subunit, cause leber congenital amaurosis. *American Journal of Human Genetics* **89**, 183-190, doi:10.1016/j.ajhg.2011.06.002 (2011).

- 73 den Hollander, A. I. *et al.* Leber congenital amaurosis and retinitis pigmentosa with Coats-like exudative vasculopathy are associated with mutations in the crumbs homologue 1 (CRB1) gene. *American Journal of Human Genetics* **69**, 198-203 (2001).
- 74 Perrault, I. *et al.* Spectrum of SPATA7 mutations in Leber congenital amaurosis and delineation of the associated phenotype. *Human mutation* **31**, E1241-1250, doi:10.1002/humu.21203 (2010).
- 75 Beck, B. B. *et al.* Mutation of POC1B in a severe syndromic retinal ciliopathy. *Human Mutation* **35**, 1153-1162, doi:10.1002/humu.22618 (2014).
- 76 Bujakowska, K. M. *et al.* Mutations in IFT172 cause isolated retinal degeneration and Bardet-Biedl syndrome. *Human Molecular Genetics* **24**, 230-242, doi:10.1093/hmg/ddu441 (2015).
- 77 Aldahmesh, M. A. *et al.* IFT27, encoding a small GTPase component of IFT particles, is mutated in a consanguineous family with Bardet-Biedl syndrome. *Human Molecular Genetics* **23**, 3307-3315, doi:10.1093/hmg/ddu044 (2014).
- 78 Scheidecker, S. *et al.* Exome sequencing of Bardet-Biedl syndrome patient identifies a null mutation in the BBSome subunit BBIP1 (BBS18). *Journal of Medical Genetics* **51**, 132-136, doi:10.1136/jmedgenet-2013-101785 (2014).
- 79 Filges, I. *et al.* Exome sequencing identifies mutations in KIF14 as a novel cause of an autosomal recessive lethal fetal ciliopathy phenotype. *Clinical genetics* **86**, 220-228, doi:10.1111/cge.12301 (2014).
- 80 Blackburn, M. G. & Belliveau, R. E. Ellis-van Creveld syndrome. A report of previously undescribed anomalies in two siblings. *American journal of diseases of children (1960)* **122**, 267-270 (1971).
- 81 Kheradmand Kia, S. *et al.* RTTN mutations link primary cilia function to organization of the human cerebral cortex. *American Journal of Human Genetics* **91**, 533-540, doi:10.1016/j.ajhg.2012.07.008 (2012).
- 82 Cantagrel, V. *et al.* Mutations in the cilia gene ARL13B lead to the classical form of Joubert syndrome. *American Journal of Human Genetics* **83**, 170-179, doi:10.1016/j.ajhg.2008.06.023 (2008).
- 83 Karmous-Benailly, H. *et al.* Antenatal presentation of Bardet-Biedl syndrome may mimic Meckel syndrome. *American journal of human genetics* **76**, 493-504, doi:10.1086/428679 (2005).
- 84 Bielas, S. L. *et al.* Mutations in INPP5E, encoding inositol polyphosphate-5-phosphatase E, link phosphatidyl inositol signaling to the ciliopathies. *Nature genetics* **41**, 1032-1036, doi:10.1038/ng.423 (2009).
- 85 Brancati, F. *et al.* MKS3/TMEM67 mutations are a major cause of COACH Syndrome, a Joubert Syndrome related disorder with liver involvement. *Human mutation* **30**, E432-442, doi:10.1002/humu.20924 (2009).
- 86 Parisi, M. A. *et al.* The NPHP1 gene deletion associated with juvenile nephronophthisis is present in a subset of individuals with Joubert syndrome. *American journal of human genetics* **75**, 82-91, doi:10.1086/421846 (2004).
- 87 Castori, M. *et al.* NPHP1 gene deletion is a rare cause of Joubert syndrome related disorders. *Journal of Medical Genetics* **42**, e9, doi:10.1136/jmg.2004.027375 (2005).



- 88 Delous, M. *et al.* The ciliary gene RPGRIP1L is mutated in cerebello-oculo-renal syndrome (Joubert syndrome type B) and Meckel syndrome. *Nature genetics* **39**, 875-881, doi:10.1038/ng2039 (2007).
- 89 Huang, L. *et al.* TMEM237 is mutated in individuals with a Joubert syndrome related disorder and expands the role of the TMEM family at the ciliary transition zone. *American Journal of Human Genetics* **89**, 713-730, doi:10.1016/j.ajhg.2011.11.005 (2011).
- 90 Boycott, K. M. *et al.* Meckel syndrome in the Hutterite population is actually a Joubert-related cerebello-oculo-renal syndrome. *American Journal of Medical Genetics Part A* **143A**, 1715-1725, doi:10.1002/ajmg.a.31832 (2007).
- 91 Forsythe, E. & Beales, P. L. Bardet-Biedl syndrome. *European journal of human genetics : EJHG* **21**, 8-13, doi:10.1038/ejhg.2012.115 (2013).
- 92 Arts, H. H. *et al.* Mutations in the gene encoding the basal body protein RPGRIP1L, a nephrocystin-4 interactor, cause Joubert syndrome. *Nature genetics* **39**, 882-888, doi:10.1038/ng2069 (2007).
- 93 Giordano, L. *et al.* Joubert syndrome with bilateral polymicrogyria: clinical and neuropathological findings in two brothers. *American journal of medical genetics Part A* **149A**, 1511-1515, doi:10.1002/ajmg.a.32936 (2009).
- 94 Simms, R. J. *et al.* Modelling a ciliopathy: Ahi1 knockdown in model systems reveals an essential role in brain, retinal, and renal development. *Cellular and molecular life sciences : CMLS* **69**, 993-1009, doi:10.1007/s00018-011-0826-z (2012).
- 95 Valente, E. M. *et al.* AHI1 gene mutations cause specific forms of Joubert syndrome-related disorders. *Annals of neurology* **59**, 527-534, doi:10.1002/ana.20749 (2006).
- 96 Higginbotham, H. *et al.* Arl13b in primary cilia regulates the migration and placement of interneurons in the developing cerebral cortex. *Developmental Cell* **23**, 925-938, doi:10.1016/j.devcel.2012.09.019 (2012).
- 97 Thomas, S. *et al.* Identification of a novel ARL13B variant in a Joubert syndrome-affected patient with retinal impairment and obesity. *European journal of human genetics* **23**, 621-627, doi:10.1038/ejhg.2014.156 (2014).
- 98 Diez-Roux, G. *et al.* A high-resolution anatomical atlas of the transcriptome in the mouse embryo. *PLOS Biology* **9**, e1000582, doi:10.1371/journal.pbio.1000582 (2011).
- 99 Thompson, C. L. *et al.* A High-Resolution Spatiotemporal Atlas of Gene Expression of the Developing Mouse Brain. *Neuron*, doi:10.1016/j.neuron.2014.05.033 (2014).
- 100 Kang, H. J. *et al.* Spatio-temporal transcriptome of the human brain. *Nature* **478**, 483-489, doi:10.1038/nature10523 (2011).
- 101 Knuesel, I. *et al.* Maternal immune activation and abnormal brain development across CNS disorders. *Nature reviews Neurology* **10**, 643-660, doi:10.1038/nrneurol.2014.187 (2014).
- 102 Stiles, J. & Jernigan, T. L. The basics of brain development. *Neuropsychology Reviews* **20**, 327-348, doi:10.1007/s11065-010-9148-4 (2010).
